# 1 **Microstructure-Informed Myelin Mapping (MIMM) from** 2 **Gradient Echo MRI using Stochastic Matching Pursuit**

3 Mert Şişman<sup>1,2</sup>, Thanh D. Nguyen<sup>2</sup>, Alexandra G. Roberts<sup>1,2</sup>, Dominick J. Romano<sup>2,3</sup>,  
4 Alexey V. Dimov<sup>2</sup>, Ilhami Kovanlikaya<sup>2</sup>, Pascal Spincemaille<sup>2</sup>, Yi Wang<sup>2,3\*</sup>

5 <sup>1</sup>Department of Electrical and Computer Engineering, Cornell University, Ithaca, New  
6 York

7 <sup>2</sup>Department of Radiology, Weill Cornell Medicine, New York, New York

8 <sup>3</sup>Meinig School of Biomedical Engineering, Cornell University, Ithaca, New York

9

10 \*Correspondence to:

11 Yi Wang, PhD.

12 Radiology, Weill Cornell Medicine

13 407 East 61<sup>st</sup> Street, New York, NY 10065, USA.

14 E-mail: [yiwang@med.cornell.edu](mailto:yiwang@med.cornell.edu)

## 15 **Highlights**

- 16       • A novel stochastic matching pursuit algorithm called microstructure-informed  
17       myelin mapping (MIMM) is developed to quantify Myelin Volume Fraction (MVF)  
18       using Magnetic Resonance Imaging (MRI) and microstructural modeling.
- 19       • MIMM utilizes a detailed biophysical model to capture the susceptibility effects on  
20       both magnitude and phase to quantify myelin and iron.
- 21       • White matter fiber orientation effects are considered for the improved MVF  
22       quantification in the major fiber tracts.
- 23       • The acquired myelin and iron maps may be utilized to monitor longitudinal disease  
24       progress.

## 25 **Abstract**

26 Quantification of the myelin content of the white matter is important for studying  
27 demyelination in neurodegenerative diseases such as Multiple Sclerosis (MS),  
28 particularly for longitudinal monitoring. A novel noninvasive MRI method, called  
29 Microstructure-Informed Myelin Mapping (MIMM), is developed to quantify the myelin  
30 volume fraction (MVF) by utilizing a multi gradient echo sequence (mGRE) and a detailed  
31 biophysical model of tissue microstructure. Myelin is modeled as anisotropic negative  
32 susceptibility source based on the Hollow Cylindrical Fiber Model (HCFM), and iron as  
33 isotropic positive susceptibility source in the extracellular region. Voxels with a range of  
34 biophysical parameters are simulated to create a dictionary of MR echo time magnitude  
35 signals and total susceptibility values. MRI signals measured using a mGRE sequence  
36 are then matched voxel-by-voxel to the created dictionary to obtain the spatial  
37 distributions of myelin and iron. Three different MIMM versions are presented to deal with  
38 the fiber orientation dependent susceptibility effects of the myelin sheaths: a basic  
39 variation, which assumes fiber orientation is an unknown to fit, two orientation informed  
40 variations, which assume the fiber orientation distribution is available either from a  
41 separate diffusion tensor imaging (DTI) acquisition or from a DTI atlas based fiber  
42 orientation map. While all showed a significant linear correlation with the reference  
43 method based on T2-relaxometry ( $p < 0.0001$ ), DTI orientation informed and atlas  
44 orientation informed variations reduced overestimation at white matter tracts compared  
45 to the basic variation. Finally, the implications and usefulness of attaining an additional  
46 iron susceptibility distribution map are discussed.

47 **Keywords:** Myelin volume fraction; Stochastic matching pursuit; Hollow cylindrical fiber  
48 model; Quantitative susceptibility mapping; Multi gradient echo

## 49 **1. Introduction**

50 The myelin sheath is a multilamellar structure of lipid bilayers formed by glial cells around  
51 the nerve fibers, which allows rapid electrical conduction between neurons and provides  
52 trophic support to the axons (Bean, 2007; Brady, Siegel, Albers, R.W., & Price, 2005).  
53 Myelination is an essential process in the development and maturation of the central  
54 nervous system, and loss of myelin (demyelination) has been implicated in normal aging  
55 as well as in neuroinflammatory and neurodegenerative diseases such as multiple  
56 sclerosis (MS) (Dobson & Giovannoni, 2019). Therefore, the development of a non-  
57 invasive myelin-specific quantitative biomarker is highly important for the diagnosis,  
58 monitoring, and therapeutic management of these diseases.

59 Myelin water fraction (MWF) mapping is a magnetic resonance imaging (MRI) method  
60 that aims to quantify the ratio of the myelin water to the total water content of each voxel  
61 (Lazari & Lipp, 2021; J. Lee et al., 2021; A. MacKay et al., 2006; Mackay et al., 1994; A.  
62 L. MacKay & Laule, 2016; Mancini et al., 2020; van der Weijden et al., 2021). Traditionally,  
63 MWF has been measured by applying multi-component T2-relaxometry to the multi-echo  
64 data acquired with a slow 2D multi-echo spin echo (MESE) sequence. More efficient 3D  
65 acquisition schemes including the gradient and spin echo (GRASE) (Prasloski et al.,  
66 2012) and fast acquisition with spiral trajectory and adiabatic T2prep (FAST-T2) (Nguyen  
67 et al., 2016; Nguyen, Spincemaille, Gauthier, & Wang, 2017; Nguyen et al., 2012) have  
68 been proposed to reduce the acquisition time for clinical translation. Due to the ill-posed  
69 nature of the inverse Laplace transform, these approaches are highly sensitive to noise,  
70 which necessitates acquisitions with a large voxel size to improve SNR. Furthermore,  
71 MWF measurements obtained by T2-based methods can be confounded by fiber

72 orientations and the presence of iron (Bartels et al., 2022; Birkl et al., 2019; Birkl et al.,  
73 2020; Birkl, Doucette, Fan, Hernández-Torres, & Rauscher, 2021).

74 More recently, there has been a great interest in myelin mapping using the multi-echo  
75 gradient echo (mGRE) sequence as it is widely available on clinical scanners and can  
76 provide whole-brain isotropic coverage in a short acquisition time with much lower specific  
77 absorption rate than spin echo sequences (Haacke, Xu, Cheng, & Reichenbach, 2004;  
78 Markl & Leupold, 2012). MWF can be calculated by performing three-compartment T2\*  
79 relaxometry of the magnitude (Du et al., 2007; Hwang, Kim, & Du, 2010) or the 3 pool  
80 complex fitting (3PCF) (H. Lee et al., 2018; Nam, Lee, Hwang, & Kim, 2015) of mGRE  
81 signal, with the latter approach considered more sensitive by utilizing the frequency  
82 offsets created by the white matter fiber bundles (Sukstanskii & Yablonskiy, 2014;  
83 Wharton & Bowtell, 2012). This approach showed that the mGRE phase is an additional  
84 source of information regarding tissue myelin content. Nevertheless, the 3PCF approach  
85 requires the non-linear iterative fitting of 10 parameters per voxel, which is slow and  
86 sensitive to the choice of parameter initialization and stopping criteria (Chan & Marques,  
87 2020; Nam et al., 2015). Furthermore, this approach overestimates the myelin content in  
88 iron-rich brain regions such as basal ganglia since iron also causes rapid signal decay  
89 and frequency shifts (Dong et al., 2021; Hédouin et al., 2021; Jung, Yun, Kim, & Kim,  
90 2022).

91 To improve the performance of mGRE-based MWF imaging, Chan and Marques (Chan,  
92 Chamberland, & Marques, 2023; Chan & Marques, 2020) proposed two algorithms that  
93 incorporate either diffusion or multi flip angle mGRE measurements on top of the regular  
94 mGRE acquisition. Although these algorithms improve myelin quantification, they require

95 long scan times (> 20 min). Recently, Hédouin et al. (Hédouin et al., 2021) proposed to  
96 generate a dictionary of complex signal evolutions based on an HCFM simulation of the  
97 WM fibers (Wharton & Bowtell, 2012, 2013), which was then utilized to train a neural  
98 network for fast parameter extraction. However, this method does not model  
99 heterogeneous background susceptibility due to iron and requires multiple orientations in  
100 data acquisition that is not feasible in clinical practice.

101 In this study, inspired by the dictionary generation strategy in (Hédouin et al., 2021) and  
102 matching pursuit approaches (Bergeaud & Mallat, 1995; Chen, 2011; Mallat & Zhang,  
103 1992; Tropp & Gilbert, 2007), we propose a novel myelin quantification method to  
104 estimate the MVF from a single 6-min mGRE scan (Sisman, Nguyen, et al., 2023; Sisman,  
105 Romano, et al., 2023). The central element of this approach is a detailed signal model  
106 which connects the macroscopic mGRE signals ( $T_2^*$  magnitude decay and magnetic  
107 susceptibility derived from quantitative susceptibility mapping (QSM) (Azuma et al., 2016;  
108 A.V. Dimov et al., 2018; T. Liu et al., 2010; Wang & Liu, 2015)) measured on the voxel  
109 level to the micro-scale myelin network and iron distribution. Further, we propose a  
110 stochastic matching pursuit algorithm for fast and effective dictionary matching. We  
111 performed in vivo evaluation of the developed MIMM method by comparing it with the  
112 3PCF algorithm and also with MWF measurements obtained by the FAST-T2 method in  
113 healthy volunteers.

## 114 2. Theory

### 115 2.1. MIMM Dictionary Generation

116 Similar to previous approaches, the hollow cylindrical geometries are initially assumed to  
 117 extend to infinity such that the field perturbations created by these cylinders do not change  
 118 along their main direction. However, in MIMM, the computed fields are only considered in  
 119 a 3D grid with fixed orientations, obtained by resampling the replicated 2D fields to the  
 120 laboratory frame of reference. The 2D field perturbations produced by the hollow cylinders  
 121 are (Wharton & Bowtell, 2012):

$$122 \quad f_{iso} = \chi_{iso} \times \begin{cases} 0, & \text{if } r < r_i \\ \frac{1}{2} \left( \cos^2 \theta - \frac{1}{3} - \sin^2 \theta \cos 2\phi \left( \frac{r_i^2}{r^2} \right) \right), & r_i < r < r_o \\ \frac{1}{2} \left( \sin^2 \theta \cos 2\phi \left( \frac{r_o^2 - r_i^2}{r^2} \right) \right) & r > r_o \end{cases} \quad (1)$$

$$123 \quad f_{ani} = \chi_{ani} \times \begin{cases} \frac{3}{4} \sin^2 \theta \ln \left( \frac{r_o}{r} \right), & \text{if } r < r_i \\ \sin^2 \theta \left( -\frac{5}{12} - \frac{\cos 2\phi}{8} \left( 1 + \frac{r_i^2}{r^2} \right) + \frac{3}{4} \ln \left( \frac{r_o}{r} \right) \right) - \cos^2 \theta, & r_i < r < r_o \\ \frac{1}{8} \left( \sin^2 \theta \cos 2\phi \left( \frac{r_o^2 - r_i^2}{r^2} \right) \right) & r > r_o \end{cases} \quad (2)$$

124 Here,  $\chi_{iso}$  and  $\chi_{ani}$  are isotropic and anisotropic volume susceptibilities of the myelin  
 125 sheath, respectively.  $f_{iso}$  and  $f_{ani}$  are the field perturbations corresponding to these two  
 126 susceptibility components.  $\theta$  is the angle between the principal fiber axis and the main  
 127 magnetic field direction of the MR scanner.  $r_i$ , and  $r_o$  are the inner and outer radii of fibers  
 128 excluding and including myelin sheath, respectively.  $\phi$  and  $r$  are the cylindrical  
 129 coordinates in the fiber frame of reference.



130 In the classical mGRE based MWI approaches, an overestimated level of myelin water in  
 131 basal ganglia is observed as a systematic artifact (Hédouin et al., 2021; Jung et al., 2022)  
 132 mainly because of the high iron concentration in these regions. In order to tackle this  
 133 problem, randomly distributed iron inclusions in the extracellular region are also included  
 134 in the simulated volume as a second major susceptibility source. Considering that brain  
 135 iron mainly exists in ferritin form (Wang & Liu, 2015) which is much smaller ( $\sim 8 - 12 \text{ nm}$ )  
 136 (Clemente-León et al., 2006) than the WM fibers ( $\sim 1 \mu\text{m}$ ) (Graf von Keyserlingk &  
 137 Schramm, 1984), iron inclusions are represented by single sub-voxels in the extracellular  
 138 space. The iron-based field perturbation ( $f_{iron}$ ) is computed by convolution with the dipole  
 139 kernel using Fourier transform for computational efficiency. In order to avoid wrapping  
 140 artifacts, the simulated volume is padded with zeros in each direction before convolution,  
 141 and the padded regions are cropped afterward. Consequently, the total field perturbation  
 142 in sub-voxel  $j$  is:

$$143 \quad f_T(j) = f_{iso}(j) + f_{ani}(j) + f_{iron}(j) \quad (3)$$

144 The complex signals corresponding to each sub-voxel for each echo (TE) time are  
 145 computed and the total signal coming from the whole volume at each TE is computed as:

$$146 \quad S_D(TE) = \rho^{IEW} \sum_{j \in \text{Intra-Extracellular}} e^{-\frac{TE}{T_2^{IEW}}} e^{-i\gamma B_0 f_T(j)TE} + \rho^{MW} \sum_{j \in \text{Myelin Sheath}} e^{-\frac{TE}{T_2^{MW}}} e^{-i\gamma B_0 f_T(j)TE}$$

147  $(4)$

148 with  $T_2^{IEW}$ , and  $T_2^{MW}$  are the transversal relaxation time constants of the intra-extracellular  
 149 and myelin water compartments, respectively. Similarly,  $\rho^{IEW}$  and  $\rho^{MW}$  are the relative  
 150 proton density of the intra-extracellular and myelin water compartments.  $\gamma$  is the  
 151 gyromagnetic ratio of water proton and  $B_0$  is the strength of the static magnetic field of

152 the MR scanner. While some parameters are varied in certain ranges to create the  
153 dictionary, some of the parameters are kept constant to decrease the dictionary size and  
154 computation time since both increase exponentially with the number of variable  
155 parameters. Moreover, it also makes the matching pursuit process more robust  
156 considering the fact that fitting for coupled parameters (such as volume susceptibilities  
157 and volume fractions) can be a more ill-posed inverse problem. The varying and constant  
158 parameters and the corresponding ranges are given in Table 1. The dictionary signal  $S_D$   
159 was computed for a TE range of  $[0, 60]$  ms with 3 ms step size (21 echoes). In summary,  
160 4 varying input parameters are chosen as:

161 (1) 2D Fiber Density (2DFD): The ratio of the hollow circles' area to the whole 2D grid  
162 area.

163 (2) g-ratio: The geometric ratio of the inner radius of the fiber axon to the outer radius  
164  $(r_i/r_o)$ .

165 (3) Extracellular Iron Density (EID): The ratio of the extracellular sub-voxels that are  
166 iron inclusions to all extracellular sub-voxels.

167 (4) Fiber Orientation ( $\theta$ ).

168 The steps of the simulation of one dictionary element are summarized in Figure 1a. First,  
169 a random distribution of 2D fibers in a circular region is created with varying radii but a  
170 fixed g-ratio (Danz, 2020). Then, the field perturbations of each myelin source are  
171 computed using Equations 1 and 2 at each sub-voxel. The computed field distribution is  
172 extended to a 3D grid by simple replication and resampling based on the fiber orientation.  
173 A smaller region of interest (ROI) at the center of the 3D grid is extracted to imitate an  
174 imaging voxel where susceptibility sources exist both inside and outside. The fiber volume

175 fraction (FVF) and iron volume fraction (IVF) of the simulated volume are computed as  
176 the relative volumes covered by the fibers and iron inclusions within this ROI.

177 It is important to note here that even though FVF and g-ratio are required to be decoupled  
178 for the simulation of the dictionary, however, the fitted values for them are not expected  
179 to be correct considering the mGRE signal is sensitive to total myelin content rather than  
180 fiber density and myelin thickness separately. Therefore, it is more convenient to claim a  
181 measure of the total myelin volume within each voxel. Consequently, the MVF value for  
182 each dictionary element can be computed as (Campbell et al., 2018):

$$183 \quad MVF = FVF (1 - (g - \text{ratio})^2) \quad (5)$$

184 Furthermore, a bulk susceptibility value is also estimated for each dictionary element  
185 based on the volumetric myelin and iron susceptibility values and volume fractions. The  
186 voxel susceptibility originating from myelin content is calculated using the isotropic  
187 component as  $\chi^{myelin} = \chi_{iso} \times MVF$  assuming that single orientation QSM measures the  
188 mean susceptibility of the susceptibility tensor; mean susceptibility is defined as the  
189 average of the eigenvalues of the susceptibility tensor (or 1/3 of the trace) (C. Wisnieff et  
190 al., 2013). Then, voxel myelin and iron susceptibilities are defined as  $\chi^{myelin} =$   
191  $\chi_{myelin} \times MVF$  and  $\chi^{iron} = \chi_{iron} \times IVF$ . Here, superscripts are utilized to refer to voxel  
192 quantities, whereas subscripts are reserved for volumetric quantities. Finally, the total  
193 susceptibility of each dictionary element is computed as:

$$194 \quad \chi^{total} = \chi^{myelin} + \chi^{iron} \quad (6)$$

195 To create the overall dictionary that will be employed for MIMM, two approaches are  
196 adopted. First, as done in the conventional MR fingerprinting (Ma et al., 2013), the input

197 parameters of the dictionary generation process are selected so that they will cover the  
198 parameter space uniformly. For instance, g-ratio is swept between 0.5 to 1 with a 0.05  
199 step size. Secondly, the parameter space coverage is driven by a random sampling  
200 approach using a uniform distribution function again using the same range of parameters  
201 (Chen, 2011). Only the 2DFD is kept uniformly sampled to ensure comprehensive  
202 coverage of the parameter space while keeping the overall computation time short. After  
203 choosing the input parameters, the remaining steps are the same for both approaches.  
204 In this paper, the dictionaries generated with the explained approaches are referred to as  
205 the deterministic pursuit dictionary and the stochastic pursuit dictionary, respectively.

## 206 **2.2. Stochastic Matching Pursuit of the Solution**

207 To match the dictionary and the acquisition echo times, the magnitude signal evolution of  
208 each element is resampled to the acquisition echo times using a 5<sup>th</sup>-order polynomial  
209 interpolation of the natural logarithm of the dictionary signals. Then, the interpolated  
210 magnitude signals are normalized to have a unit Euclidian norm.

### 211 **2.2.1. Basic MIMM**

212 The microstructural properties of each voxel are determined by an exhaustive search in  
213 the dictionary based on a novel similarity metric which is a linear combination of the  
214 traditional linear correlation between the dictionary and measured magnitude signal  
215 evolutions and the absolute difference between  $\chi^{total}$  of the dictionary elements and  
216 tissue susceptibilities ( $\chi^{QSM}$ ) of the measurements. Linear correlation is widely used in  
217 MR fingerprinting for quantitative MR studies (Ma et al., 2013).  $\chi^{QSM}$  is the quantitative  
218 susceptibility value of each voxel estimated from the mGRE phase data. The idea to  
219 combine the magnitude signal evolution and QSM for quantitative imaging has previously

220 been employed for MRI based oxygen extraction fraction (OEF) mapping (Cho,  
221 Spincemille, Nguyen, Gupta, & Wang, 2021). The dictionary element that minimizes the  
222 following cost function is determined for each voxel  $k$ .

$$223 \quad \hat{d} = \underset{d \in D}{\operatorname{argmin}} (1 - \langle |S_D|, |S| \rangle) + \lambda_\chi |\chi_D^{total} - \chi^{QSM}| \quad (7)$$

224 Here,  $|S_D|$  and  $|S|$  are the normalized magnitude signal evolutions of the dictionary  
225 elements and the imaging voxel, respectively.  $\lambda_\chi$  is a weighting parameter that determines  
226 the relative weighting of the two terms.  $D$  is the dictionary and  $\hat{d}$  is the dictionary element  
227 that minimizes the cost function. The corresponding  $MVF$ ,  $\theta$ , and  $\chi^{iron}$  values of  $\hat{d}$  are  
228 then assigned to the voxel that is being processed to assemble the corresponding  
229 biophysical parameter maps.

### 230 **2.2.2. DTI Orientation Informed MIMM**

231 Even though basic MIMM tries to tackle the fiber orientation dependence of the HCFM  
232 based MIMM by assuming  $\theta$  is an unknown, it is known that in order to estimate the fiber  
233 orientation from mGRE measurements, data with at least 3 different sampling orientations  
234 is required (Wharton & Bowtell, 2013). Therefore, the  $\theta$  values provided by the basic  
235 MIMM are expected to have high error, thereby also inducing errors in the estimated MVF.  
236 MIMM is improved here by incorporating a fiber orientation map obtained from a separate  
237 Diffusion Tensor Imaging (DTI) scan as:

$$238 \quad \hat{d} = \underset{d \in D}{\operatorname{argmin}} (1 - \langle |S_D|, |S| \rangle) + \lambda_\chi |\chi_D^{total} - \chi^{QSM}| \quad \text{given } \theta = \theta_{DTI} \quad (8)$$

239 Here, the exhaustive search procedure to find the best matching element is limited to the  
240 dictionary elements whose orientation values ( $\theta$ ) match with the DTI fiber orientation  
241 ( $\theta_{DTI}$ ). Before this procedure, the dictionary orientation values and the orientation values

242 obtained from DTI are rounded to the nearest multiple of  $5^\circ$ . Moreover, orientation  
243 informed MIMM is applied only at the voxels where the fractional anisotropy (FA) value  
244 computed from the diffusion tensor (DT) is larger than 0.25 and the QSM value is lower  
245 than 0.1 ppm. This prevented using unreliable orientation values in the cortical gray  
246 matter where highly organized fiber tracts do not exist, and in basal ganglia, where DTI  
247 measurements can be erroneous due to the existence of high levels of iron.

### 248 **2.2.3. Atlas Orientation Informed MIMM**

249 In the case that subject-specific WM fiber orientation is not available, we propose to use  
250 the orientation map obtained from a DTI brain atlas such as The International Consortium  
251 of Brain Mapping (ICBM) DTI-81 normative atlas (Mazziotta, Toga, Evans, Fox, &  
252 Lancaster, 1995; Mori et al., 2008). In this work, the atlas diffusion tensor was warped  
253 from the MNI ICBM-152 space to the subject mGRE space.

254 The MIMM algorithm is summarized in Figure 1a. Examples of dictionary magnitude  
255 signal evolution as a function of fiber orientation and g-ratio are shown in Figure 1(c-d).

## 256 **3. Methods**

257 Different aspects of the MIMM algorithm are evaluated utilizing Monte Carlo simulations,  
258 and experimental data from healthy subjects. The experimental myelin volume fraction  
259 maps are compared with myelin water fraction maps obtained with conventional T2-  
260 relaxometry (Nguyen et al., 2016; Nguyen et al., 2017). Furthermore, 3PCF is also  
261 implemented as described in (Nam et al., 2015) and the obtained MWF maps are  
262 compared with the MVF maps both quantitatively and qualitatively.

### 263 **3.1. Simulation Grid Resolution and Size Optimization**

264 As described in Section 2.1, in order to obtain the magnitude signal evolution of a  
265 dictionary element, a finite-size simulation volume needs to be created and the  
266 corresponding field perturbation distribution needs to be calculated. Considering the fact  
267 that an imaging voxel generally contains thousands of fibers, simulating a realistic voxel  
268 requires extremely high computation power and time. On the other hand, if we employ a  
269 relatively larger grid size of simulation than a single fiber, the resulting magnitude signal  
270 evolution may approximate the signal of a voxel that is substantially larger. In order to  
271 assess this idea, simulation volumes with varying resolutions and sizes were created  
272 (assuming the largest fiber radius is  $10 \mu\text{m}$  (Graf von Keyserlingk & Schramm, 1984)) and  
273 the corresponding magnitude signal evolutions were computed. In Figures 2a and 2d, the  
274 created simulation volumes with varying grid resolution and sizes are shown, respectively.  
275 Figures 2b and 2e demonstrate the corresponding magnitude signal evolutions, and  
276 Figures 2c and 2f depict the corresponding computation time for each case. Figures 2b  
277 and 2c suggest that there is minimal change in the magnitude signal evolution between  
278 grid resolutions 256 and 512 even though the required computation time to obtain these

279 signal curves is almost 5 times larger for the latter. Similar observations were made for  
280 grid sizes  $50 \mu m$  and  $100 \mu m$ . Therefore, for the rest of this study, all the dictionary  
281 elements are computed utilizing a  $256^3$  grid at  $50 \mu m$  resolution.

### 282 **3.2. Monte Carlo Simulations**

283 In order to evaluate the sensitivity of the MIMM approach to MRI signal noise, a separate  
284 set of data ( $N = 10000$ ) was computed with random simulation parameters while keeping  
285 the constant parameters in Table 1 the same. For a given Signal-to-noise ratio (SNR)  
286 level, all the dictionary elements were corrupted with noise. Independent identically  
287 distributed (i.i.d.) Gaussian noise with standard deviation (s.t.d.)  $\frac{1}{SNR}$  were added to both  
288 the real and imaginary parts of the signal evolutions before normalization (Note that the  
289 first echo magnitude is 1 before normalization). Moreover, Gaussian noise with s.t.d.  
290  $\frac{0.3}{SNR}$  ppm was also added to the  $\chi^{total}$  values. Then, the noise corrupted signals and  
291  $\chi^{total}$  values were matched with the original dictionary as if it was a real measurement  
292 using various echo times and  $\lambda_\chi$  values. The mean absolute error of the estimated MVF  
293 values  $MVF_{j,E}$  was computed as:

$$294 \quad \epsilon_{MVF} = \frac{1}{N} \sum_{j=1}^N |MVF_{j,T} - MVF_{j,E}| \quad (9)$$

295 were  $MVF_{j,T}$  were the true MVF value of the  $j^{th}$  simulated data point. This was computed  
296 for the basic and the orientation informed MIMM strategies under different levels of noise.  
297 Moreover, it is also used to investigate the effect of the weighting factor  $\lambda_\chi$  in Equations  
298 7 and 8 and of the dictionary size.



### 299 **3.3. MR Data Acquisition**

300 Healthy subject data were acquired on a 3T MRI scanner (Prisma<sup>fit</sup>, Siemens  
301 Healthineers, Erlangen, Germany) using a 64-channel array head coil in ten volunteers  
302 (7 males, 3 females, age range: 25–51) following an IRB-approved protocol. Informed  
303 consent was obtained from each subject. The protocol for each scan was as follows:

304 (1) Whole-brain T1-weighted (T1w) scan using Magnetization Prepared Rapid  
305 Acquisition Gradient Echo (MPRAGE) with acquisition parameters: axial field of  
306 view FOV = 25.6 cm, phase FOV factor 100%, repetition time TR = 2300 ms, echo  
307 time TE = 2.26 ms, voxel size = 1 mm<sup>3</sup> isotropic, readout bandwidth RBW = 200  
308 Hz/pixel, flip angle FA = 8°, GRAPPA acceleration factor = 2, acquisition time =  
309 5:21 min (176 slices).

310 (2) Monopolar 3D mGRE with acquisition parameters: FOV = 25.6 cm, phase FOV  
311 factor = 81.3%, TR = 41 ms, TE<sub>1</sub>/ΔTE = 2.2/3.25 ms, number of TEs = 7, voxel  
312 size = 1×1×2 mm<sup>3</sup> (interpolated to 1 mm<sup>3</sup> isotropic), RBW = 260 Hz/pixel, FA = 15°,  
313 slice partial Fourier factor = 0.875, GRAPPA acceleration factor = 2, acquisition  
314 time = 6:05 min (160 slices).

315 (3) FAST-T2 with acquisition parameters: 3-dimensional spiral acquisition with TR/TE  
316 = 7.6/0.5 ms, FOV = 25.6 cm, phase FOV factor=100%, sequence TR = 2000 ms;  
317 T2prep TEs = 0 (T2prep pulse turned off), 7.5, 17.5, 67.5, 147.5, and 307.5 ms,  
318 voxel size = 1.3×1.3×2 mm<sup>3</sup> (interpolated to 1×1×2 mm<sup>3</sup>), RBW = 1042 Hz/pixel,  
319 FA = 10°, number of spiral leaves per stack = 32, acquisition time = 8 min (80  
320 slices).

321 (4) 2D Spin Echo Echo Planar Imaging (SE-EPI) Diffusion Weighted Imaging  
322 (DWI) with acquisition parameters: number of diffusion encoding directions = 30,  
323 b-value = 1000 s/mm<sup>2</sup>, FOV = 24 cm, phase FOV factor = 100%, TR = 10000 ms,  
324 TE= 70 ms, voxel size = 1.9×1.9×2.5 mm<sup>3</sup>, RBW =1562 Hz/pixel, slice partial  
325 Fourier factor = 0.75, GRAPPA acceleration factor = 2, acquisition time = 5:40 min  
326 (60 slices).

## 327 **3.4. Data Processing**

### 328 **3.4.1. ROI Segmentations**

329 For regional MWF and MVF analysis, a total of 15 ROIs were selected for each subject:  
330 5 subcortical GM ROIs (Globus Pallidus, Putamen, Caudate, Thalamus, Hippocampus)  
331 were extracted from  $T_1w$  images using FreeSurfer(Fischl, 2012); and 10 WM ROIs (Genu,  
332 Splenium, and Body of Corpus Callosum, External Capsule, Anterior Limb of Internal  
333 Capsule, Optic Radiation, Superior Longitudinal Fasciculus, Superior Corona Radiata,  
334 Cingulate Gyrus, and Cerebro Spinal Tract) were chosen from the WM parcellation map  
335 provided by the DTI-81 atlas (Mori et al., 2008).

### 336 **3.4.2. DTI Image Reconstruction**

337 First, the susceptibility induced  $B_0$  off-resonance map is estimated from mGRE phase  
338 data using a nonlinear fitting algorithm (T. Liu et al., 2013) and spatially unwrapped  
339 (Cusack & Papadakis, 2002). Then, DWI images were corrected for geometric distortions  
340 using the estimated off-resonance map and FSL FEAT algorithm (Jenkinson, Beckmann,  
341 Behrens, Woolrich, & Smith, 2012; Woolrich, Ripley, Brady, & Smith, 2001). Finally,  
342 Diffusion Tensor images were reconstructed using the FSL DTIFIT algorithm (Behrens et  
343 al., 2003).

### 344 **3.4.3. QSM Image Reconstruction**

345 QSM images were reconstructed from the same field used for DTI image correction. The  
346 background field is removed using the projection onto dipole fields (PDF) algorithm (T.  
347 Liu et al., 2011) and QSM is reconstructed using Morphology-Enabled Dipole Inversion  
348 (MEDI) with global cerebrospinal fluid (CSF) referencing (A.V. Dimov et al., 2022; J. Liu  
349 et al., 2012; Z. Liu, Spincemaille, Yao, Zhang, & Wang, 2018).

### 350 **3.4.4. Myelin Content Image Reconstructions**

351 The macroscopic field inhomogeneity effects in the mGRE magnitude data are corrected  
352 using the library-driven voxel spread function approach (Y. Liu et al., 2021; Yablonskiy,  
353 Sukstanskii, Luo, & Wang, 2013). The MIMM algorithm was implemented in MATLAB  
354 R2020a (Mathworks, Natick, Massachusetts, USA), and all the in vivo data were  
355 processed using the same implementation. Furthermore, the 3PCF algorithm proposed  
356 by Nam et al. (Nam et al., 2015) was also implemented to estimate the MWF map using  
357 the mGRE data. The implementation details provided in (Nam et al., 2015) were followed  
358 in addition to some additional smoothing introduced before fitting to suppress noise, due  
359 to the lower number of echoes available. Finally, MWF from FAST-T2 was extracted as  
360 described in (Nguyen et al., 2016).

361 For the in vivo data,  $\lambda_\chi$  was determined using L-curve analysis (Hansen, 1992) by  
362 balancing the two error terms in Equations 7 and 8 in a representative subject. It was also  
363 found this balancing can be limited to a subset of the data in a subject: In this work,  $\lambda_\chi$   
364 was determined by averaging the two error terms obtained within all the voxels in the 10  
365 central slices.

366 Selecting the dictionary size poses a tradeoff between the goodness of the match (it is  
367 possible to find a better match in the dictionary with a larger size) and the time required  
368 for the matching pursuit process. In a representative subject, the MVF map was obtained  
369 with different dictionary sizes and the average minimum matching error together with the  
370 image entropy (Pal & Pal, 1991) were computed over the whole brain white matter. Image  
371 entropy level was employed to quantify the detail in the image features.

### 372 **3.4.5. Image Registrations**

373 Several registrations between different subject image spaces and to/from ICBM-152  
374 space were required during data processing. All the registrations can be summarized  
375 here:

376 (1) A linear transformation (affine transform) from subject DTI space to mGRE space  
377 was estimated using FSL Linear Image Registration Tool (FLIRT) (Jenkinson,  
378 Bannister, Brady, & Smith, 2002), the b-value = 0 image from DTI dataset and  
379 combined T2\*-weighted (T2\*w) magnitude image of the mGRE and the FA map  
380 was brought to mGRE space. The first principal eigenvector of the reconstructed  
381 DTI images ( $V_1$ ) was registered to the mGRE space using the estimated linear  
382 transformation and FSL *vecreg* command to estimate  $\theta$  maps.

383 (2) Nonlinear transformation (affine transform and warp field) was estimated from  
384 ICBM-152 space to individual subject T1 space using ANTs SyN algorithm  
385 (Avants, Tustison, & Song, 2009). Then, a linear transformation from subject T1  
386 space to mGRE space was estimated again using ANTs. The ICBM-81 DTI atlas  
387 was brought to the mGRE space using the computed transformations as a single-

388 step transformation. The first principal eigenvector ( $V_1$ ) of the registered ICBM-81  
389 DTI atlas and then the corresponding  $\theta$  maps were calculated.

390 (3) The linear transformation from subject FAST-T2 space to mGRE space was  
391 estimated using FSL FLIRT to bring the estimated reference MWF maps to mGRE  
392 space.

393 (4) Finally, ROI segmentation masks that reside on subject T1 and ICBM-81 DTI atlas  
394 spaces were brought to subject mGRE space with FSL FLIRT and ANTs using the  
395 computed linear and nonlinear transformations, respectively.

396 A desktop PC (CPU: Intel i7-5820k, 3.3 GHz; 64 GB RAM) was used for all the data  
397 processing steps.

## 398 4. Results

399 Figure 3a shows example MVF maps obtained using the basic matching pursuit with both  
400 the deterministic and stochastic versions, as well as using two dictionary sizes. MVF  
401 maps obtained with stochastic matching are visibly smoother and present less “salt-and-  
402 pepper-noise” compared to those obtained using deterministic matching. No obvious  
403 improvement with the increased dictionary size was observed, even though the larger  
404 dictionary increases the computational cost of matching by a factor of 4. To visualize the  
405 source of this significant difference in the results, we projected the input parameters of 2  
406 example dictionaries (deterministic pursuit dictionary with size 12540 and stochastic  
407 pursuit dictionary with size 12000) onto the (g-ratio,  $\theta$ ) plane (Figure 3b). Even though  
408 the total number of dictionary elements is similar, the parameter coverage of the  
409 stochastic pursuit dictionary is improved in certain subspaces. Furthermore, in Figure 3c  
410 all the dictionary elements are shown g-ratio –  $\theta$  – IVF parameter space to visualize the  
411 3D space coverage. Even though it is difficult to see the difference between the two  
412 dictionaries as in the 2D case, it can be seen that the total number of elements is similar.

413 Figure 4a shows two L-curve results for different subjects.  $\lambda_\chi = 0.015$  was approximately  
414 located at the corner of the L-curve for both subjects and then used for all the further  
415 results. Example MVF maps using both the basic and orientation informed MIMM for 3  
416 different values of  $\lambda_\chi$  are demonstrated in Figure 4b. Additionally, Figure S1 presents the  
417 results of the Monte Carlo experiments to evaluate the performance of the MIMM based  
418 quantification of the microstructural properties with different  $\lambda_\chi$  values. It demonstrates  
419 the mean absolute errors of the 3 output parameters of the MIMM algorithm for both basic  
420 and orientation informed MIMM strategies with both deterministic pursuit and stochastic

421 pursuit dictionaries. The plots show that mean absolute errors increase with decreased  
422 SNR levels as expected. Furthermore, for most of the results, the accuracy is higher when  
423 orientation informed MIMM strategy is utilized. The error levels are relatively constant for  
424 a large range of  $\lambda_\chi$  values except between  $10^{-4}$  and  $10^2$ , where an optimal value of  $\lambda_\chi$   
425 maximizes the accuracy of the fitting. However, this value is SNR-dependent.

426 Figure 5a shows a comparison between various dictionary sizes. From dictionary size  
427 20000 to 80000, the minimum matching error decreases by 6%, and the image entropy  
428 increases by only 1%. These results suggest that the increase in the matching  
429 performance and the change in the image features are subtle after a dictionary size of  
430 20000 even though the dictionary size and consequently the matching time increases by  
431 a factor of 400%. Hence, a dictionary size of 20000 was employed for all the results  
432 hereafter unless otherwise stated. Example MVF results using both the basic and  
433 orientation informed MIMM for 3 different dictionary sizes are shown in Figure 5b. Figure  
434 S2 shows the Monte Carlo simulation results regarding the dependence of the accuracy  
435 of the MIMM algorithm on the dictionary size. It is seen that after an approximate  
436 dictionary size of 10000, changes in the accuracy are below 4%.

437 Four axial slices of the obtained MVF maps in a single subject using the basic MIMM  
438 strategy, DTI orientation informed strategy, and atlas orientation informed strategy are  
439 shown in Figure 6 and Figure S4 along with the corresponding T1w images, QSM maps,  
440 MWF maps obtained with 3PCF from the mGRE data, MWF maps obtained with T2-  
441 relaxometry from the FAST-T2 data and FA maps. All MVF maps correlated well visually  
442 with the reference FAST-T2 MWF maps. Compared to 3PCF MWF maps, MVF maps  
443 display a lower level of noise and image artifacts. The globus pallidus is visibly

444 overestimated in the 3PCF MWF maps compared to the MVF maps (red arrows).  
445 Orientation informed MIMM reduces some of the visible overestimations in the main fiber  
446 tracts compared to basic MIMM (green arrows). However, overestimation is still present  
447 in certain tracts like the posterior limb of the internal capsule (yellow arrows) that  
448 correspond to the fiber tracts oriented in the superior-inferior direction (blue/purple  
449 regions in the FA map).

450 Figure 7 shows the results from the ROI based linear correlation analysis between the  
451 MVF maps obtained with all 3 MIMM strategies and the FAST-T2 MWF maps, as well as  
452 that between 3PCF MWF and FAST-T2 MWF for comparison. All 3 MVF maps show a  
453 significant correlation with FAST-T2 MWF with a correlation of  $r \approx 0.73-0.75$  whereas the  
454 3PCF MWF map shows a significant correlation with  $r = 0.34$ . Subject-specific linear  
455 correlation analysis results for each method are presented in Figures S4-S8.

456 A comparison of the orientation maps in a single subject between the ICBM DTI-81 atlas  
457 based approach and the subject DTI orientation based map is presented in Figure 8. The  
458 two orientation estimates as well as the corresponding MVF maps are compared using  
459 linear regression and Bland-Altman analysis of the ROI averages in Figure 8b.

460 Figure 9a presents example iron susceptibility distribution maps obtained with 3 MIMM  
461 strategies for an example subject. Average  $\chi^{iron}$  values across all the subjects within  
462 different cortical gray matter parcellations are shown in Figure 9b. The voxel-wise  
463 distribution of the MVF and  $\chi^{iron}$  for all 10 subjects are presented in Figure 10 as violin  
464 plots for three major brain regions (cerebral white matter, cortical gray matter, and deep  
465 gray matter). In order to suppress voxel-wise noise effects in this plot, the parameter  
466 maps were blurred with a Gaussian kernel of size  $5 \times 5 \times 5$  beforehand.



467 In order to evaluate the reproducibility capability of the results with MIMM, the MVF maps  
468 of the same subject are computed 8 times independently with 8 different dictionaries with  
469 dictionary size 10000 and  $\lambda_{\chi} = 0.015$  utilizing orientation informed MIMM. The  
470 reconstructed maps and the voxel-wise mean and standard deviation images are  
471 depicted in Figure S3.

## 472 **5. Discussion**

473 In this study, we have demonstrated the feasibility of using an HCFM based modeling of  
474 the myelin sheaths and the inclusion of iron sources for the quantification of myelin in  
475 brain tissue. Better correlation with the reference MWF maps and better visual quality  
476 were obtained using the MIMM algorithm compared to the prior 3PCF. Fiber orientation  
477 helps myelin mapping accuracy at white matter tracts, and atlas information seems  
478 sufficient, providing similar results as subject-specific DTI orientation maps. Finally,  
479 paramagnetic iron-specific susceptibility distributions are demonstrated as an additional  
480 output of the MIMM algorithm.

481 MIMM improves myelin mapping by better modeling the mGRE signal of white matter in  
482 the following aspects compared to prior methods, which is consistent with findings from  
483 improving QSM biophysics modeling (A. V. Dimov et al., 2015; A. V. Dimov et al., 2018;  
484 Kee et al., 2017; Wen et al., 2021). First, realistic HCFM is used to model the field  
485 perturbation distribution due to the myelin content of tissues and the corresponding  
486 magnitude decay curves. Second, the brain iron is modeled as an additional susceptibility  
487 source that was not explicitly accounted for in the previous methods. Finally, local QSM  
488 values are utilized for voxel-wise myelin and iron quantification rather than the non-local  
489 phase.

490 Stochastic matching pursuit provides effective filtering of signals not modeled in the  
491 dictionary. This study considers 2 effective water pools (intra-extracellular and myelin):  
492 myelin water as a bound water pool that is trapped between the lipid bilayers of the myelin  
493 sheath demonstrates much faster decay and the water pools inside and outside the cells.  
494 The CSF water pool that is included in a lot of the previous MWF works (Mackay et al.,

495 1994; A. L. MacKay & Laule, 2016; Nguyen et al., 2016) demonstrates negligible decay  
496 in most of the mGRE acquisitions with relatively short echo times ( $T_{2CSF} > 600$  ms)  
497 (Meyers, Kolind, & MacKay, 2017). Therefore, the CSF water pool can be effectively  
498 ignored in constructing the dictionary.

499 The use of random grid sampling of the dictionaries in stochastic matching pursuit is very  
500 useful for accurate myelin mapping at a given SNR level, as shown in simulations (Figure  
501 S1). In vivo, smoother MVF maps with lower apparent noise (Figure 3a) were obtained  
502 using the stochastic pursuit dictionary. Stochastic pursuit reduces the quantization  
503 mismatching errors due to the large gaps in the sampled parameter locations in the  
504 deterministic pursuit dictionary as seen in Figure 3(b-c). Particularly, the stochastic pursuit  
505 dictionary projected onto the g-ratio –  $\theta$  plane provides smaller gaps or much denser  
506 parameter distribution although the dictionary sizes are similar. Figure 3b shows an  
507 almost continuous sampling of the g-ratio with the stochastic pursuit dictionary whereas  
508 a fixed quantization level of 0.05 in the deterministic pursuit grid dictionary is responsible  
509 for the apparent quantization errors in Figure 3a. Another benefit of the random sampling  
510 strategy for dictionary generation is the fact that the dictionary size can be increased in  
511 any desired fashion instead of the exponential growth of a conventional dictionary that  
512 arises by increasing sampling density in each parameter direction. This provides the  
513 flexibility that an optimum dictionary size can be determined more easily from a linearly  
514 increasing dictionary size search range as illustrated in Figure 5 and Figure S2. One  
515 drawback of the utilization of stochastic pursuit dictionaries is the intrinsic uncertainty  
516 introduced in the results by the different randomness of the dictionary. This can be  
517 observed in Figure S3 as a certain level of variation is observed in the results

518 reconstructed with different dictionaries of the same size. Even though the visual  
519 differences are minimal between different results, there is a voxel-wise standard deviation  
520 that goes as high as 2% in the white matter. This can be an issue for reproducibility unless  
521 the same dictionary is used for the reconstruction of different cases, or a fixed random  
522 seed is utilized for the dictionary generation. This observation requires further  
523 investigation in the future.

524 The L-curves shown in Figure 4a demonstrate well the behaved selection of the weighting  
525 strength. Significant changes in the image contrast and artifacts were observed in Figure  
526 4b as  $\lambda_\chi$  increased. First of all, for low  $\lambda_\chi$ , the magnitude term in Equations 7 and 8  
527 dominates during the matching pursuit process which diminishes the ability to separate  
528 myelin and iron. The basal ganglia, especially globus pallidus, are assigned very high  
529 MVF values. High  $\lambda_\chi$  values, on the contrary, lead to overestimated MVF values in the  
530 fiber tracts where the QSM values are very low (negative and high in magnitude) even  
531 with orientation informed MIMM and noisy texture in the remaining areas. MVF  
532 overestimation cannot be addressed in this case since orientation information is  
533 employed in the magnitude term. The intermediate values provide a balance between the  
534 two terms and reduce the errors using the complementing information arising from the  
535 two terms.

536 The MIMM algorithm addresses two major disadvantages in the prior 3PCF approach for  
537 MWF mapping: the lack of information regarding the separation of myelin and iron and  
538 the high number of model parameters. The former creates an artificial overestimation of  
539 the myelin content in regions with high iron deposition such as basal ganglia while the  
540 latter causes noisy parameter maps due to the intrinsic ill-posedness of the fitting process

541 with a high number of fitting parameters. The inclusion of iron in the biophysical model  
542 and QSM in the matching provides a framework to separate the magnitude decay due to  
543 myelin and iron. Additionally, the 3PCF approach also requires a much longer  
544 computation time which can be a detrimental factor in clinical settings. For instance, the  
545 fitting of a single subject took ~3 hours with our computation setting whereas the MIMM  
546 algorithm took approximately 4 mins. Moreover, utilization of the HCFM further accounts  
547 for the orientation effects in the white matter fiber tracts. The matching pursuit process  
548 with the biophysical modeling provides MVF maps with higher visual quality since the  
549 effective number of parameters that are solved is lower.

550 In Figure 7, the linear correlation with the reference FAST-T2 MWF obtained with all of  
551 the three MVF quantification methods was higher compared to that of the 3PCF MWF  
552 maps. This is in line with the improved qualitative performance shown in Figure 6. The  
553 surprising result here is that utilization of the orientation informed MIMM seems to provide  
554 no quantitative improvement over the basic MIMM. This is in contrast to the lower mean  
555 absolute errors observed in the simulation (Figure S1) and the better visual consistency  
556 with the FAST-T2 MWF map in Figure 6. Here, it should be noted that when orientation  
557 informed MIMM is utilized, not only does the vertical dispersion in the data points in Figure  
558 7 decrease but the slope of the best-fitting line also decreases. These two parallel  
559 decreases both in the slope and data dispersion probably cancel each other out and  
560 produce a similar correlation coefficient. This can be explained considering most of the  
561 ROIs chosen in this study belong to the major white matter fiber tracts and the MVF values  
562 in these tracts decrease consistently when the orientation informed MIMM is utilized. A  
563 similar correlation does not mean similar accuracy since the correlation coefficient

564 between two vectors will stay the same if one vector is scaled by a constant whereas the  
565 accuracy will change. Even though we showed that orientation informed MIMM provides  
566 better estimates of the MVF, basic MIMM has its practical advantage where it does not  
567 require any orientation map and still provides decent MVF distributions except for the  
568 overestimated values in the major fiber tracts. The promising result in Figure 8 is that  
569 almost identical MVF can be obtained using an atlas based fiber orientation distribution  
570 that is registered to the mGRE space rather than the orientation maps obtained from a  
571 separate DTI acquisition. The availability of a T1 weighted scan, which is often acquired  
572 in clinical protocols, can enhance image registration that is required for the atlas  
573 orientation informed MIMM. In a scenario where it is not available, direct registration of  
574 the atlas based diffusion tensor to the mGRE space can be realized but the accuracy  
575 might get lower. The MVF made available from standard mGRE using MIMM processing  
576 described in this work would allow routine study of myelin in various neurological  
577 disorders, including multiple sclerosis (Dobson & Giovannoni, 2019; Eskreis-Winkler et  
578 al., 2015; Cynthia Wisnieff et al., 2015) and amyotrophic lateral sclerosis (S. Kolind et al.,  
579 2013; Schweitzer et al., 2015).

580 A natural byproduct of the MIMM method is the  $\chi^{iron}$  distribution that demonstrates the  
581 concentration of iron in different brain regions. Even though this was not the main focus  
582 of this study, mapping the susceptibility distribution due to iron is also a clinically relevant  
583 task. Some examples of clinical interest in iron susceptibility mapping are the  
584 paramagnetic rim lesion detection in MS patients (Marcille et al., 2022) and motor cortex  
585 iron quantification in Amyotrophic Lateral Sclerosis (ALS) patients (Adachi et al., 2015).  
586 In Figure 9a, the  $\chi^{iron}$  maps of the healthy subject are almost identical for the three

587 matching strategies. This shows that orientation informed MIMM does not substantially  
588 impact the  $\chi^{iron}$  distribution. This is likely due to the isotropic nature of the iron-related  
589 susceptibility sources. Figure 9b shows the non-uniform iron concentration in different  
590 gray matter regions of healthy subjects. Interestingly, in cortical gray matter, the motor  
591 cortex shows slightly higher iron concentrations compared to other regions, consistent  
592 with the literature (Kwan et al., 2012). After the separation of the myelin and iron content  
593 in the voxels, it is possible to evaluate their individual distributions in different regions of  
594 the brain. The violin plots in Figure 10 are provided as an example visualization of this  
595 kind of evaluation. MVF values have higher mean values in the white matter compared to  
596 cortical gray matter and deep gray matter as expected. Deep gray matter regions seem  
597 to have significant myelin content as well. In terms of iron, on the other hand, deep gray  
598 matter regions seem to have the highest content. The mean iron content in white matter  
599 and cortical gray matter regions seem to be close whereas the median iron content in  
600 white matter seems to be higher than cortical gray matter. The highest positive  
601 susceptibility source content in the cortical regions was observed to exist in the superficial  
602 white matter in the previous studies (S. Lee, Shin, Kim, & Lee, 2023) which can explain  
603 the current results. The results with different MIMM strategies, however, do not  
604 demonstrate an obvious difference in the distributions.

605 Though the use of an orientation prior in MIMM improves the myelin quantification in most  
606 of the white matter fiber tracts such as corpus callosum and optic radiation (green arrows  
607 in Figure 6), it fails to correct the overestimation in some fiber tracts such as the posterior  
608 limb of the internal capsule (yellow arrows in Figure 6). The main reason for the  
609 overestimation in those areas in the first place is the strong negative susceptibility effects

610 in these fiber tracts that can be seen in the QSM images. With the utilization of the QSM  
611 term during the matching pursuit process, these strong negative values translate into high  
612 MVF. The HCFM predicts strong magnetic field perturbations in the extracellular space if  
613 the fibers are approximately perpendicular to the main magnetic field (red and green  
614 fibers in the FA map). Therefore, the amount of decay in those areas can be explained  
615 by the existence of a moderate amount of myelin. In this way, orientation informed MIMM  
616 corrects for those overestimations in the fiber tracts oriented left-to-right or anterior-to-  
617 posterior. However, the fiber tracts oriented superior-to-inferior do not follow the HCFM  
618 prediction since they still manifest highly negative QSM values. This means that even  
619 though the field perturbation due to myelin is very small, the material susceptibility of the  
620 existing myelin sheaths is substantial as captured by QSM. A possible explanation of this  
621 situation can be the existence of fiber crossings in those areas that are not covered by  
622 the current model. This remains to be a limitation of this study that needs to be  
623 investigated in future studies.

624 Another limitation of this study is the utilization of the fixed T2 values for the myelin and  
625 intra-extracellular water pools. This was done to decrease the number of free variables  
626 to solve for and make the matching pursuit process more well-posed. Another limitation  
627 is that the fibers inside the voxels are assumed to have the same orientation. This  
628 assumption will break in voxels with fiber crossings. In future studies, the model can be  
629 improved by including multi orientation fibers and multi T2 water pools. The stability of the  
630 fitting can then be improved using spatial regularization.



## 631 **6. Conclusion**

632 A novel microstructure informed matching pursuit method called MIMM is developed to  
633 measure MVF based on detailed biophysical modeling of the human brain using HCFM  
634 and distinct susceptibility source inclusions. The MIMM method is superior to previously  
635 developed 3PCF based myelin quantification using mGRE signals in terms of accuracy,  
636 visual quality, and processing time. A significant linear correlation with the reference T2-  
637 relaxometry method is observed ( $r = 0.75$ ,  $p < 0.0001$ ) whereas a significant correlation  
638 is observed with the 3PCF with lower correlation ( $r = 0.34$ ,  $p < 0.0001$ ). Furthermore, the  
639 feasibility of utilizing an atlas-based fiber orientation map was also investigated instead  
640 of a subject-specific fiber orientation map acquired using DTI since it may not be available  
641 in routine clinical scans. MIMM has the potential to be used as a myelin and iron  
642 quantification tool for longitudinal studies.

643

644

645

646

647

648

649

650

651

652 **Data statements**

653 All images used in this work are de-identified to protect privacy of human participants.  
654 Code is available at <https://github.com/MertSisman/MIMM>. An example dataset is  
655 provided at <https://zenodo.org/record/8193673>. Remaining data is available to interested  
656 researchers upon reasonable request.

657 **CRedit authorship contribution statement**

658 **Mert Şişman:** Conceptualization, Methodology, Software, Validation, Formal analysis,  
659 Investigation, Data curation, Writing - original draft, Visualization. **Thanh D. Nguyen:**  
660 Conceptualization, Methodology, Resources, Data Curation, Writing - Review & Editing,  
661 Supervision. **Alexandra G. Roberts:** Software. **Dominick J. Romano:**  
662 Conceptualization. **Alexey V. Dimov:** Conceptualization, Supervision. **Ilhami**  
663 **Kovanlikaya:** Conceptualization, Supervision. **Pascal Spincemaille:** Conceptualization,  
664 Methodology, Resources, Writing - Review & Editing, Supervision. **Yi Wang:**  
665 Conceptualization, Methodology, Writing - review & editing, Supervision, Funding  
666 acquisition.

667 **Declaration of Competing Interest**

668 A.V.D., P.S. and Y.W. are inventors of QSM-related patents issued to Cornell University.  
669 P.S. and Y.W. hold equity in Medimagetric LLC. T.D.N. and P.S. are paid consultants  
670 for Medimagetric LLC.

671 **Acknowledgments**

672 This work was supported in part by research grants from the NIH: R01NS105144,  
673 R01NS090464, R01NS095562, S10OD021782, R01HL151686, and National MS  
674 Society: RG-1602-07671.

675

676 **FIGURES**

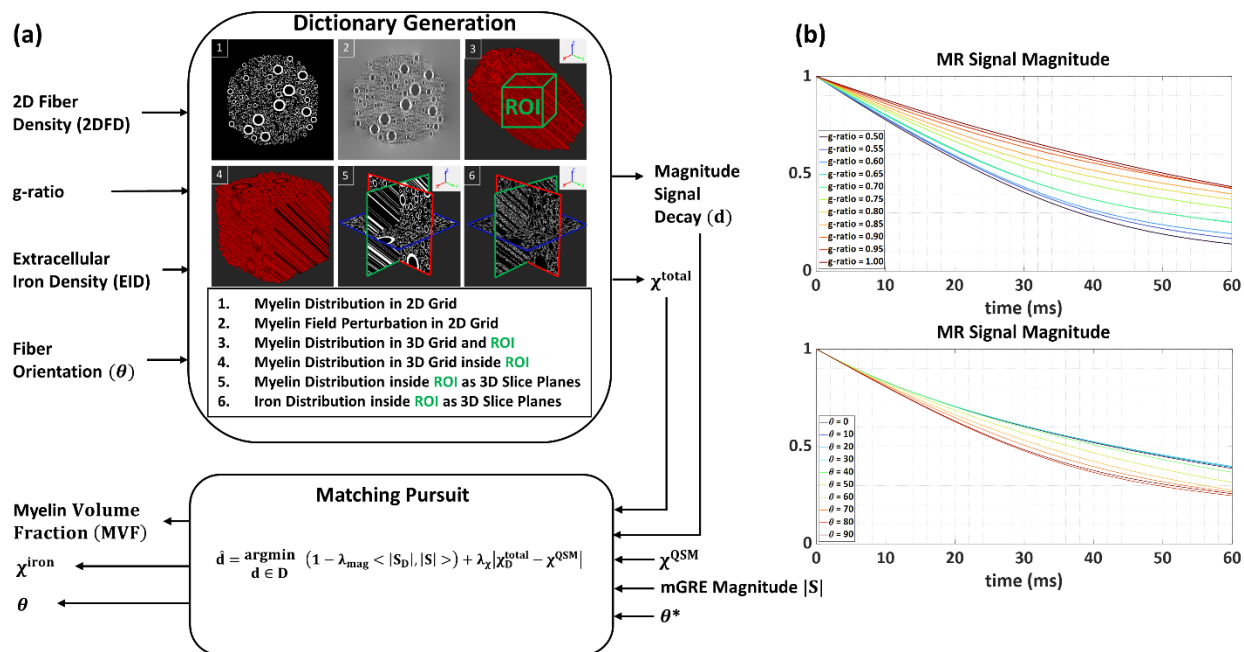

\*Required only with the Orientation Informed Matching.

677

678 Figure 1. a) A detailed description of the dictionary generation and matching pursuit

679 process. b) Example dictionary elements showing how the magnitude signal evolutions

680 depend on the g-ratio and  $\theta$  values.

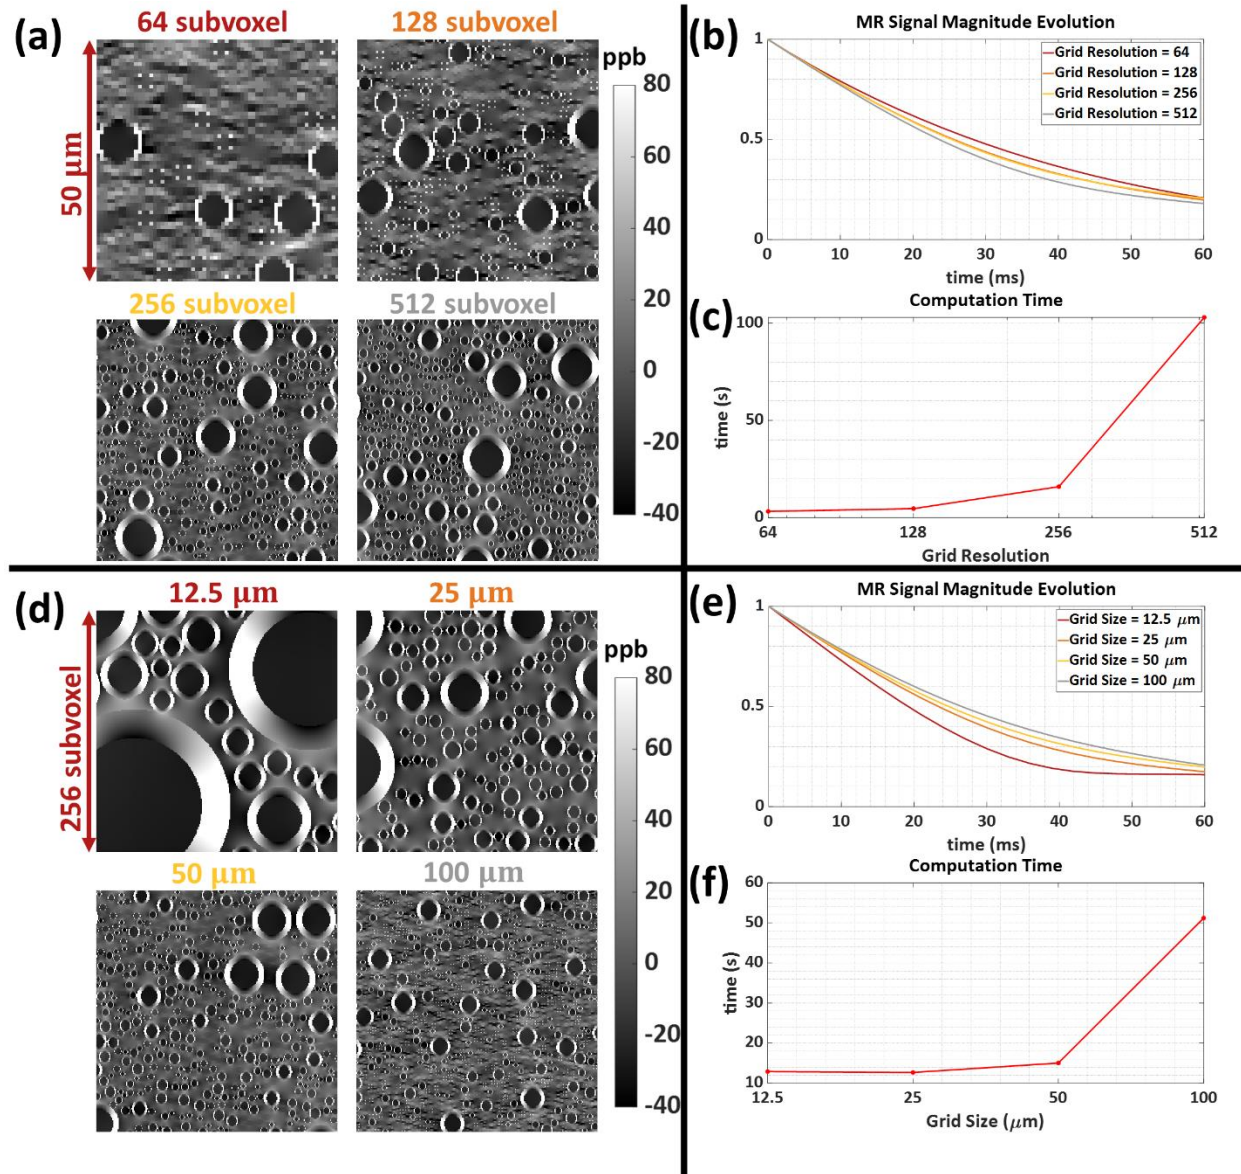

681

682 Figure 2. Comparison of different grid resolutions and grid sizes for the MR magnitude  
 683 signal evolution simulations. a) Field perturbation distributions in 4 different resolution  
 684 levels where the grid size is the same ( $50\mu$ ). b) Signal magnitude evolutions  
 685 corresponding to 4 different resolutions. c) The time spent computing each signal  
 686 magnitude evolution for each resolution. d) Field perturbation distributions in 4 different  
 687 grid sizes where the grid resolution is the same (256 sub-voxel). e) Signal magnitude

688 evolutions corresponding to 4 different grid sizes. f) The time spent computing each signal  
689 magnitude evolution for each grid size.

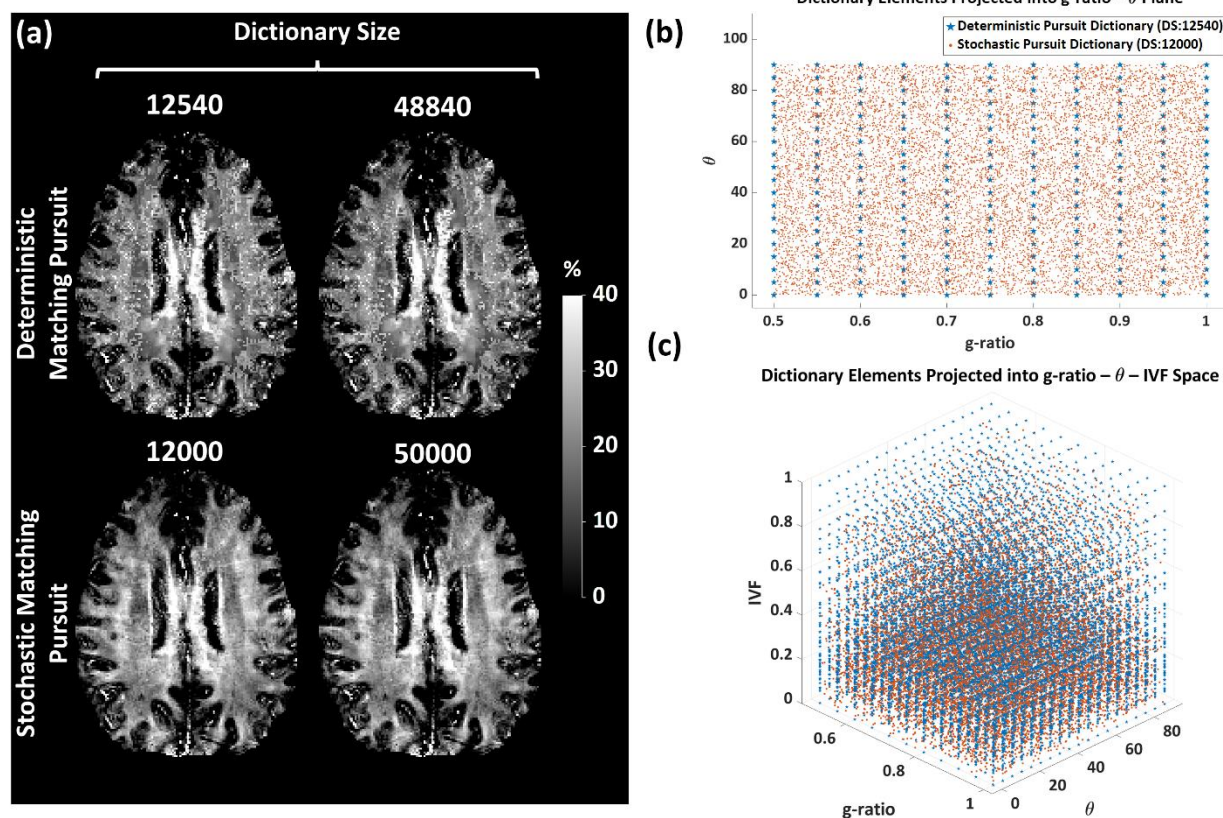

690  
691 Figure 3. Comparison of the deterministic and stochastic matching pursuit (MIMM)  
692 results. a) Example MVF maps obtained with deterministic matching pursuit and MIMM  
693 with different dictionary sizes. Basic MIMM is utilized in this example. b) Projection of all  
694 the dictionary elements utilized for the two pursuits onto the g-ratio -  $\theta$  plane. c)  
695 Projection of all the dictionary elements onto g-ratio -  $\theta$  - IVF parameter space.

696

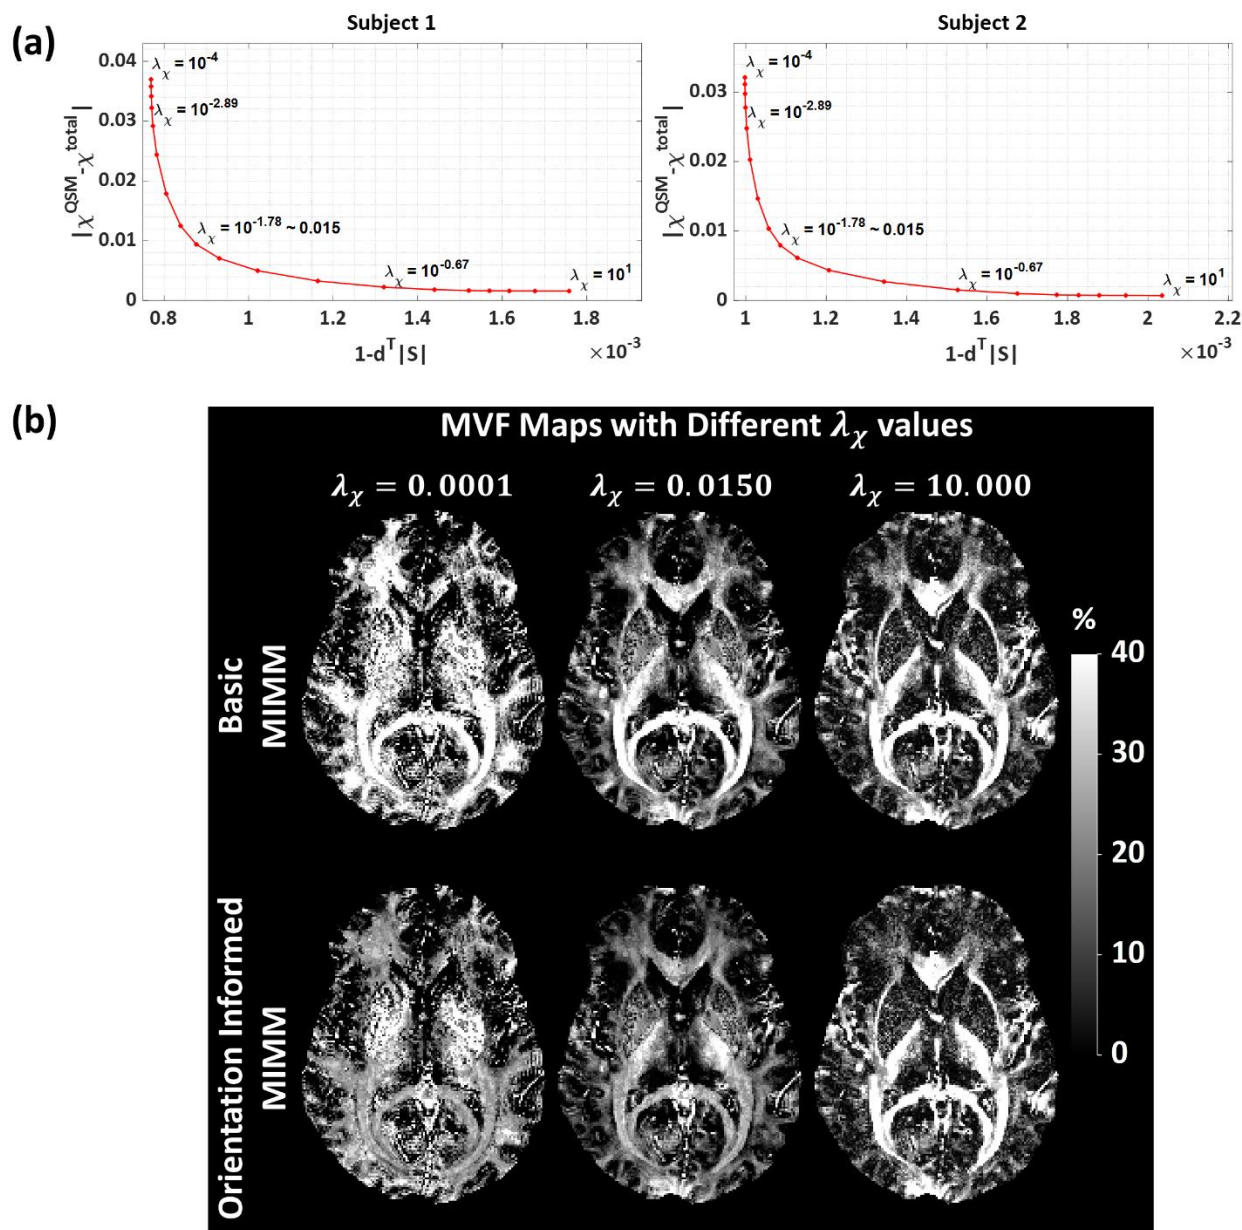

697

698 Figure 4. Analysis regarding the choice of the optimal weighting parameter  $\lambda_\chi$ . a) L-curve  
 699 analysis results for 2 different subjects using basic MIMM. The values demonstrated in  
 700 the plots are obtained by averaging the errors obtained with the given  $\lambda_\chi$  among all the  
 701 voxels in 10 central slices. b) MVF maps obtained using basic and orientation informed  
 702 MIMM using DTI and the dictionary of size 20000 with different  $\lambda_\chi$  values.



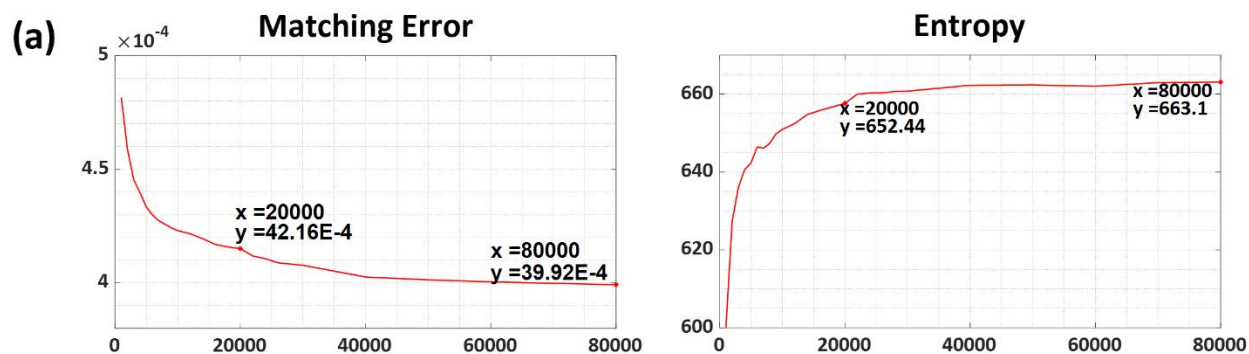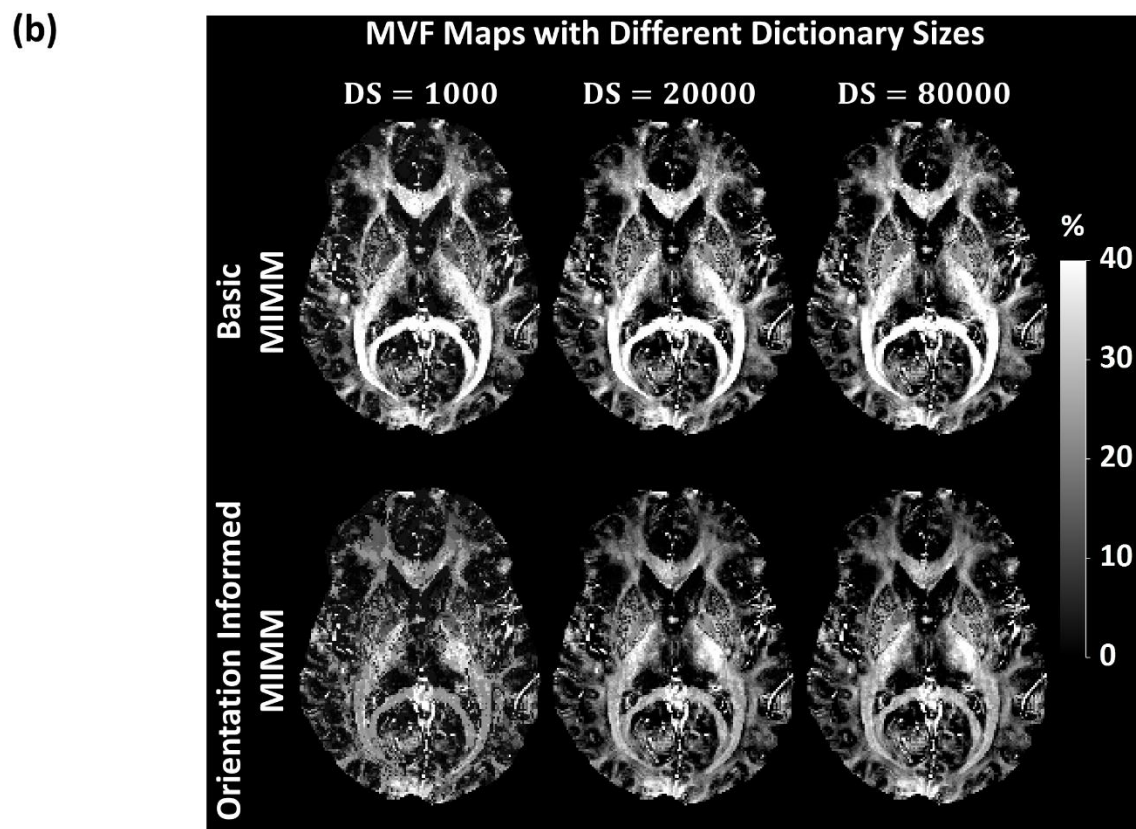

703

704 Figure 5. Analysis regarding the choice of the optimal dictionary size. a) Average

705 minimum fitting error and image entropy values computed over the white matter for an

706 example subject for basic MIMM. b) MVF maps obtained using basic and DTI orientation

707 informed MIMM using different dictionary sizes using  $\lambda_\chi = 0.015$ .

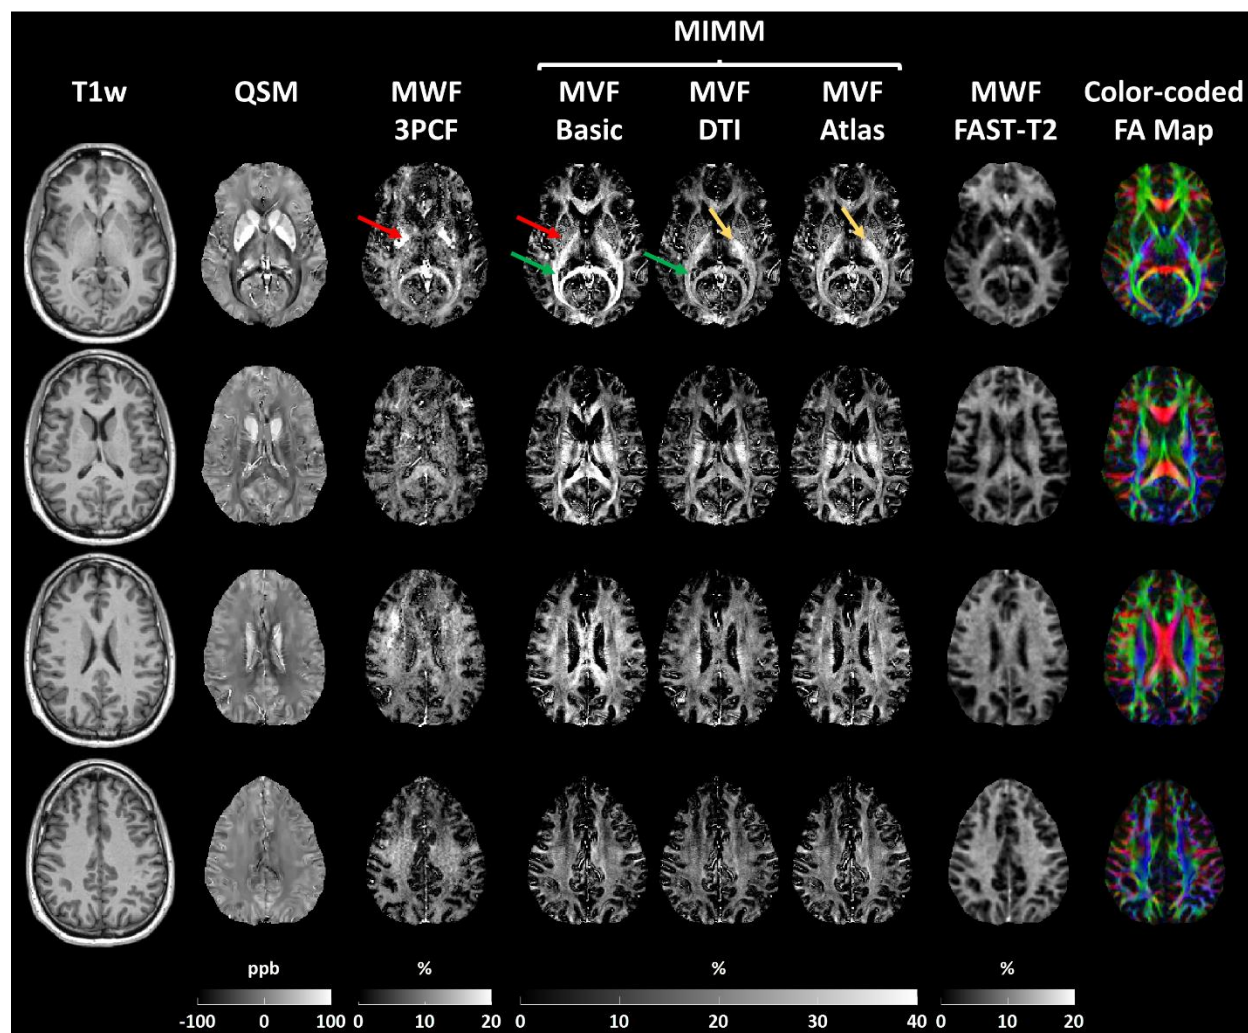

708

709 Figure 6. Example results from a single subject. From left to right: T1-weighted images  
710 (T1w), QSM maps, MWF maps obtained with 3 pool complex fitting (3PCF), MWF maps  
711 obtained with basic MIMM, DTI orientation informed MIMM, and atlas orientation informed  
712 MIMM, MWF maps obtained using T2-relaxometry from the FAST-T2 data, and FA maps  
713 obtained from diffusion tensor images. All images are registered to the QSM space.

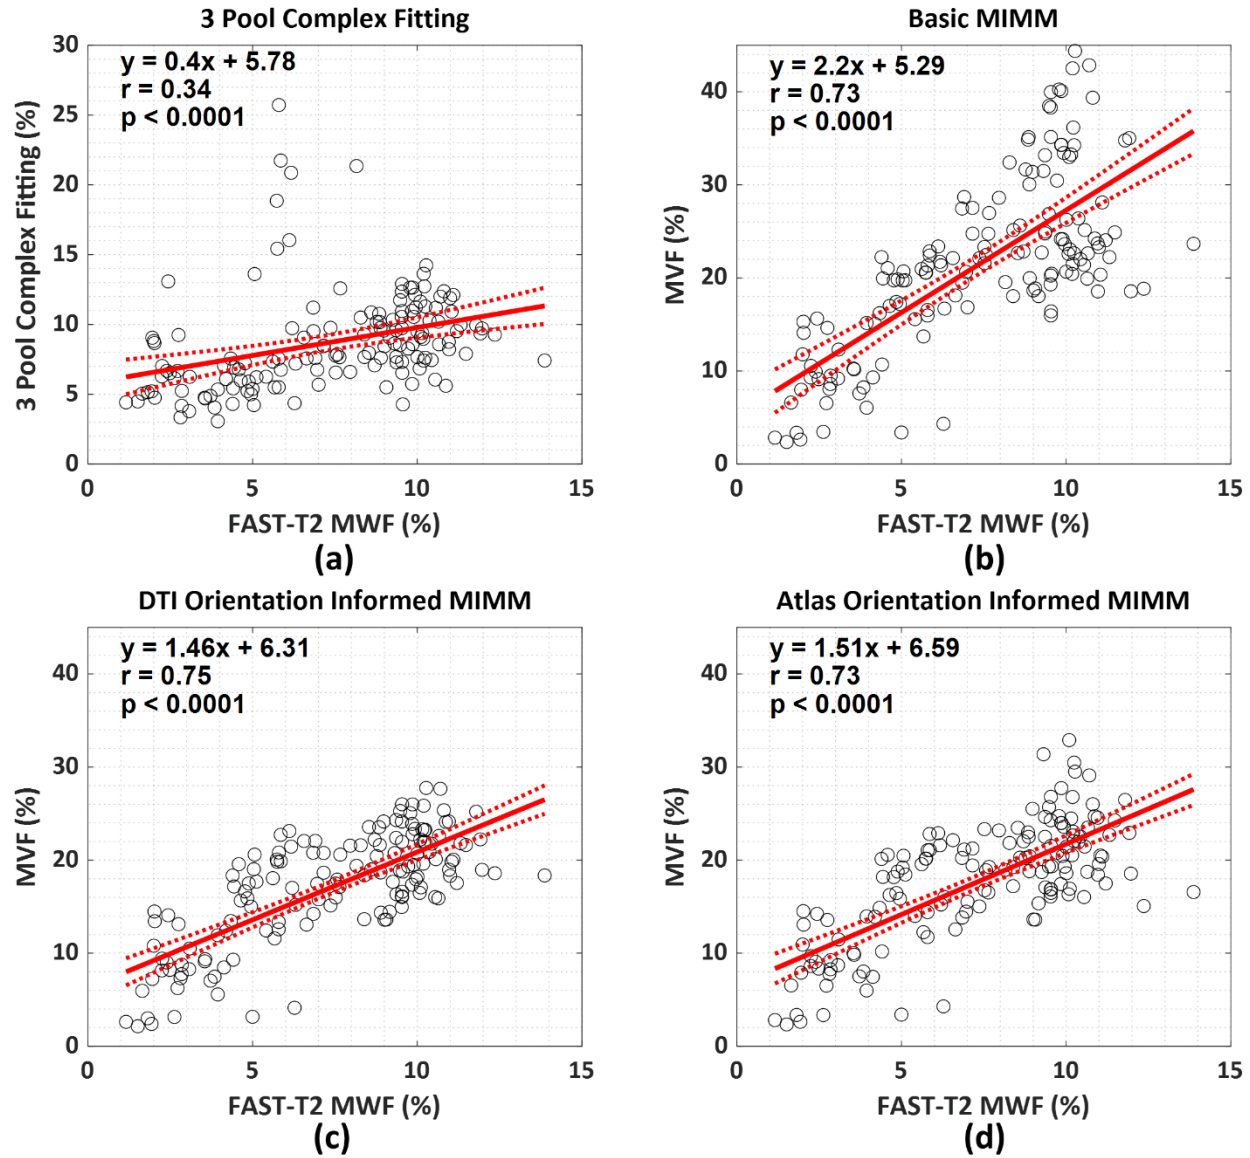

714

715 Figure 7. Linear correlation analysis results between the FAST-T2 based MWF maps and  
716 a) the MWF maps obtained using the 3 pool complex fitting, the MVF maps are acquired  
717 from maps obtained using b) basic MIMM, c) DTI orientation informed MIM, and d) atlas  
718 orientation informed MIMM.

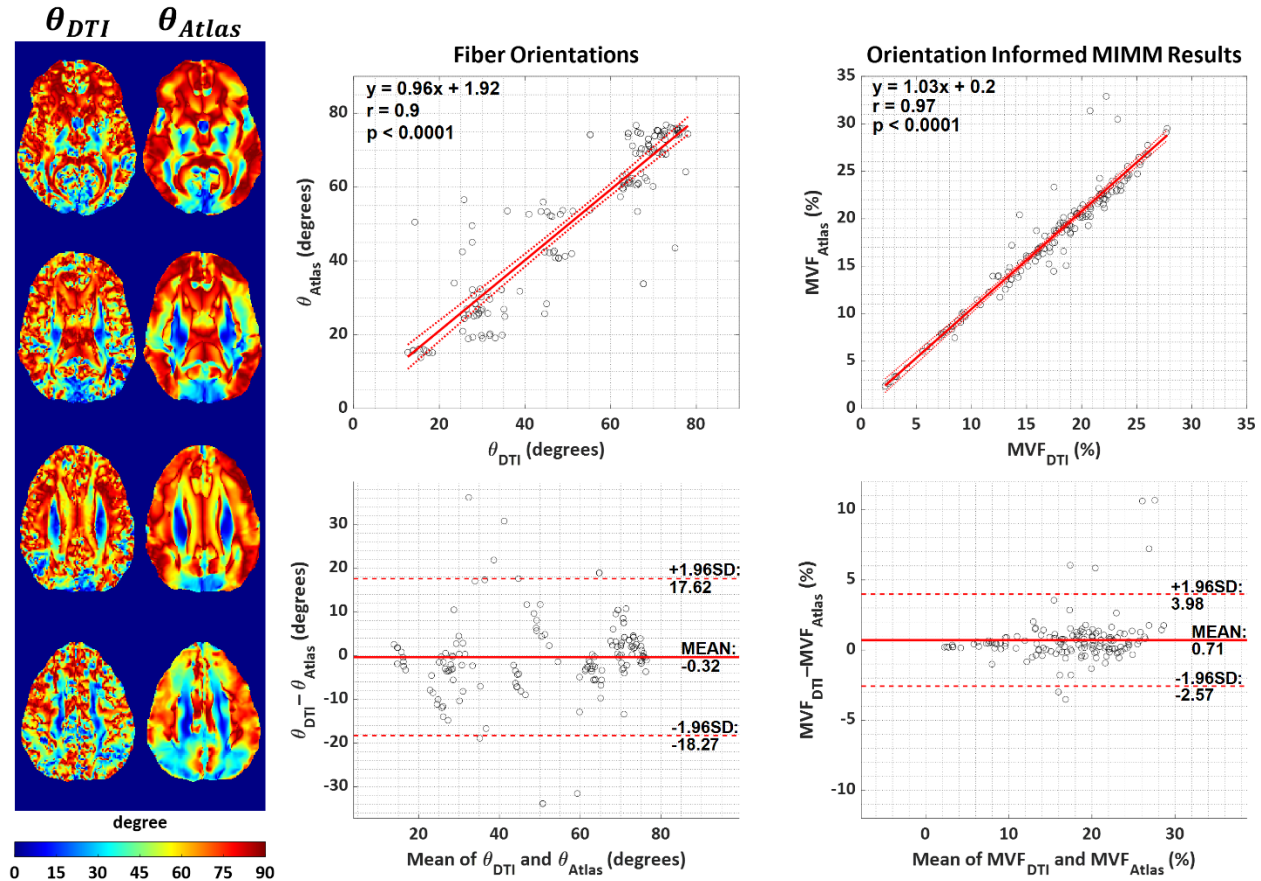

719

(a)

(b)

720 Figure 8. a) Comparison of the orientation maps extracted from DT images ( $\theta_{DTI}$ ) and  
 721 ICBM DTI-81 atlas ( $\theta_{Atlas}$ ). b) Results of the linear correlation and Bland-Altman analysis  
 722 between the ROI orientation angle values (left column) and the ROI MVF values obtained  
 723 using orientation informed MIMM using the corresponding orientation maps.

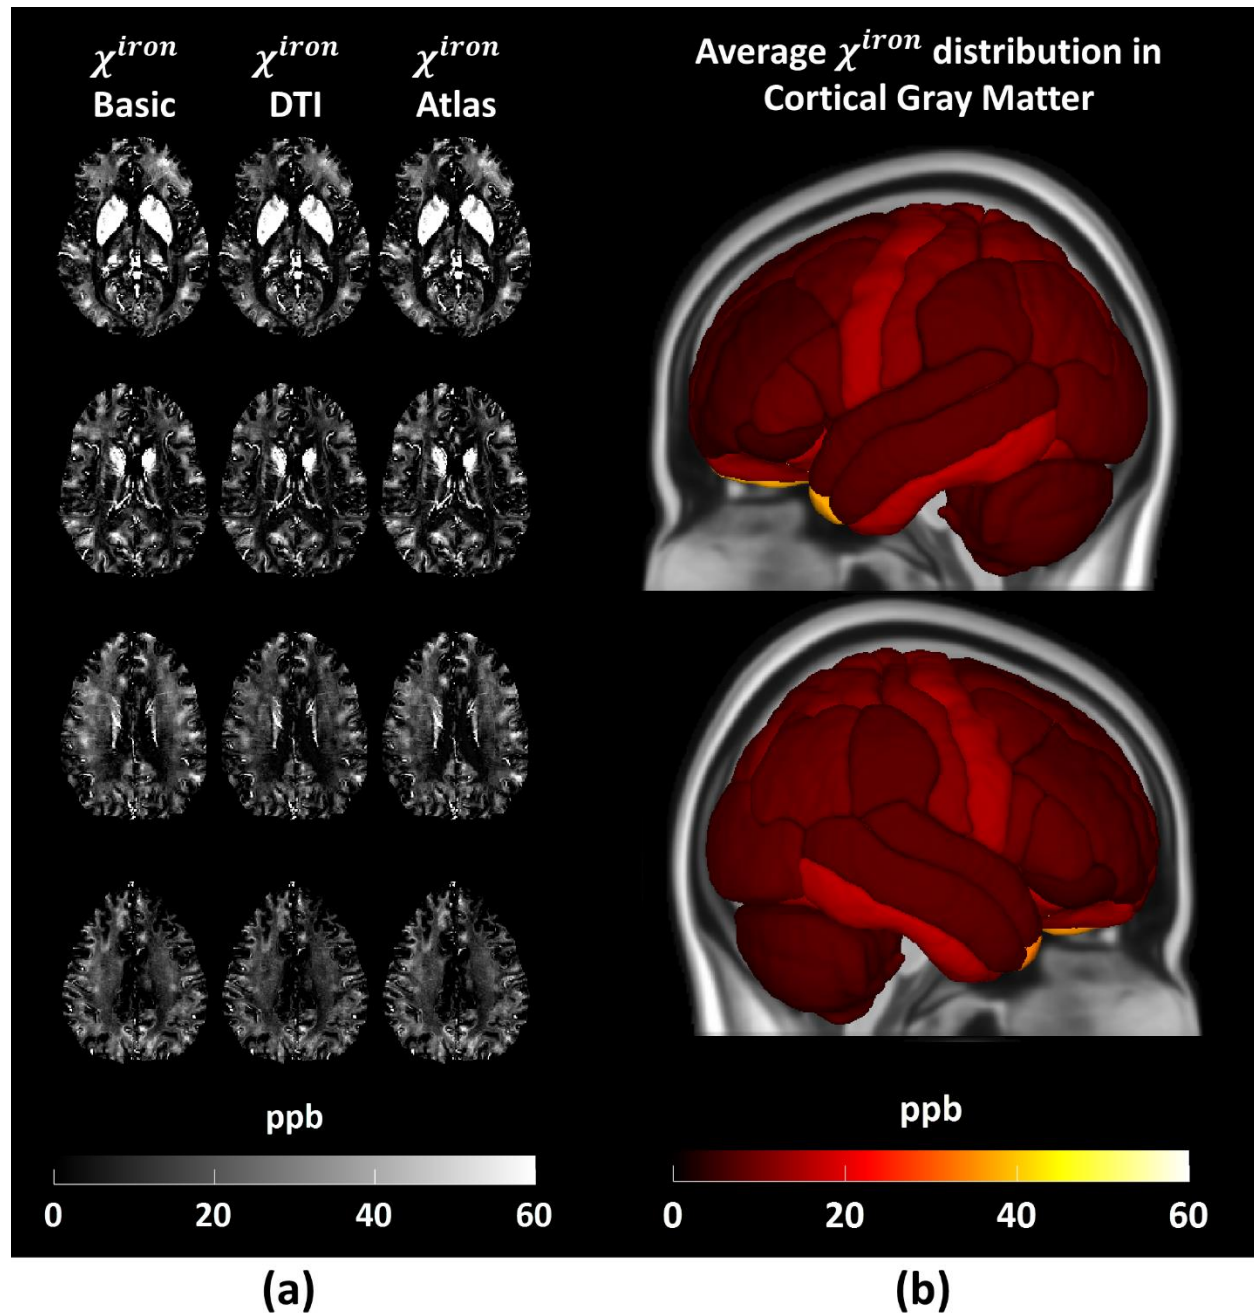

724

725 Figure 9. Example results of the  $\chi^{iron}$  maps. a)  $\chi^{iron}$  maps obtained from a single subject.

726 From left to right:  $\chi^{iron}$  maps obtained with basic MIMM, DTI orientation informed MIMM,

727 and atlas orientation informed MIMM. b) Average  $\chi^{iron}$  values across all subjects within

728 different cortical gray matter parcellations.

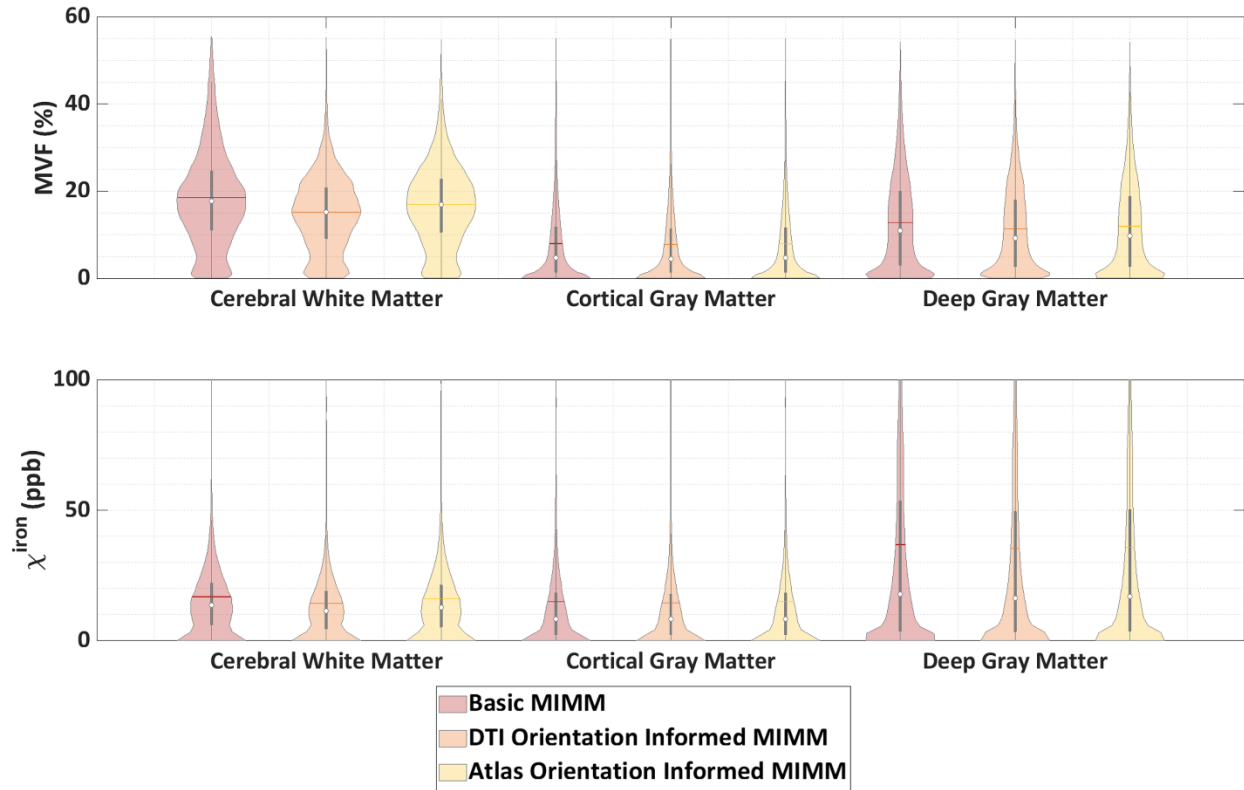

729

730 Figure 10. Violin plots showing the distribution of the voxel values in MVF (top row) and

731  $\chi^{iron}$  (bottom row) maps combined over all 10 subjects for 3 major brain regions.

## 732 TABLES

733 Table 1: 3D microstructure informed dictionary simulation parameters and the utilized  
 734 ranges of the parameters. The parameters are shown in 4 different categories based on  
 735 their functions. 4 input parameters are the parameters that need to be defined for the  
 736 simulations required to create a dictionary element. Intermediate parameters are the  
 737 volume fractions that are estimated from the created volume distribution of myelin and  
 738 iron and utilized to estimate voxel susceptibilities. Output parameters are the labels of  
 739 each dictionary element that are assigned to each voxel after MIMM. The final set is the  
 740 constant parameters that have been used in the dictionary generation. The values of the  
 741 constant parameters are determined using the reported literature values. The  
 742 corresponding studies for each constant parameter are also provided.

|                                                       | Parameter                                                 | Range                                                                        |
|-------------------------------------------------------|-----------------------------------------------------------|------------------------------------------------------------------------------|
| <b>Dictionary Generation Process Input Parameters</b> | <b>2DFD</b>                                               | [0,1]                                                                        |
|                                                       | <b>g – ratio</b>                                          | [0.5,1]                                                                      |
|                                                       | <b><math>\theta</math></b>                                | [0°,90°]                                                                     |
|                                                       | <b>EID</b>                                                | [0,1]                                                                        |
| <b>Intermediate Parameters</b>                        | <b>FVF</b>                                                | [0,0.75]                                                                     |
|                                                       | <b>IVF</b>                                                | [0,1]                                                                        |
| <b>MIMM Output Parameters</b>                         | <b>MVF</b>                                                | [0,0.55]                                                                     |
|                                                       | <b><math>\chi^{\text{iron}}</math></b>                    | [0 ppb,300 ppb]                                                              |
| <b>Constant Parameters</b>                            | <b><math>\chi_{\text{iso}} = \chi_{\text{ani}}</math></b> | –100 ppb (Wharton & Bowtell, 2012)                                           |
|                                                       | <b><math>\chi_{\text{iron}}</math></b>                    | 300 ppb (Zheng, Nichol, Liu, Cheng, & Haacke, 2013)                          |
|                                                       | <b><math>T_2^{\text{IEW}}</math></b>                      | 70 ms (S. H. Kolind, Mädler, Fischer, Li, & MacKay, 2009)                    |
|                                                       | <b><math>T_2^{\text{MW}}</math></b>                       | 16 ms (Hédouin et al., 2021; Xu, Foxley, Kleinnijhuis, Chen, & Miller, 2018) |
|                                                       | <b><math>\rho^{\text{IEW}}</math></b>                     | 1 (Hédouin et al., 2021; Xu et al., 2018)                                    |
|                                                       | <b><math>\rho^{\text{MW}}</math></b>                      | 0.5 (Hédouin et al., 2021; Xu et al., 2018)                                  |

743

744 **SUPPLEMENTARY MATERIALS**

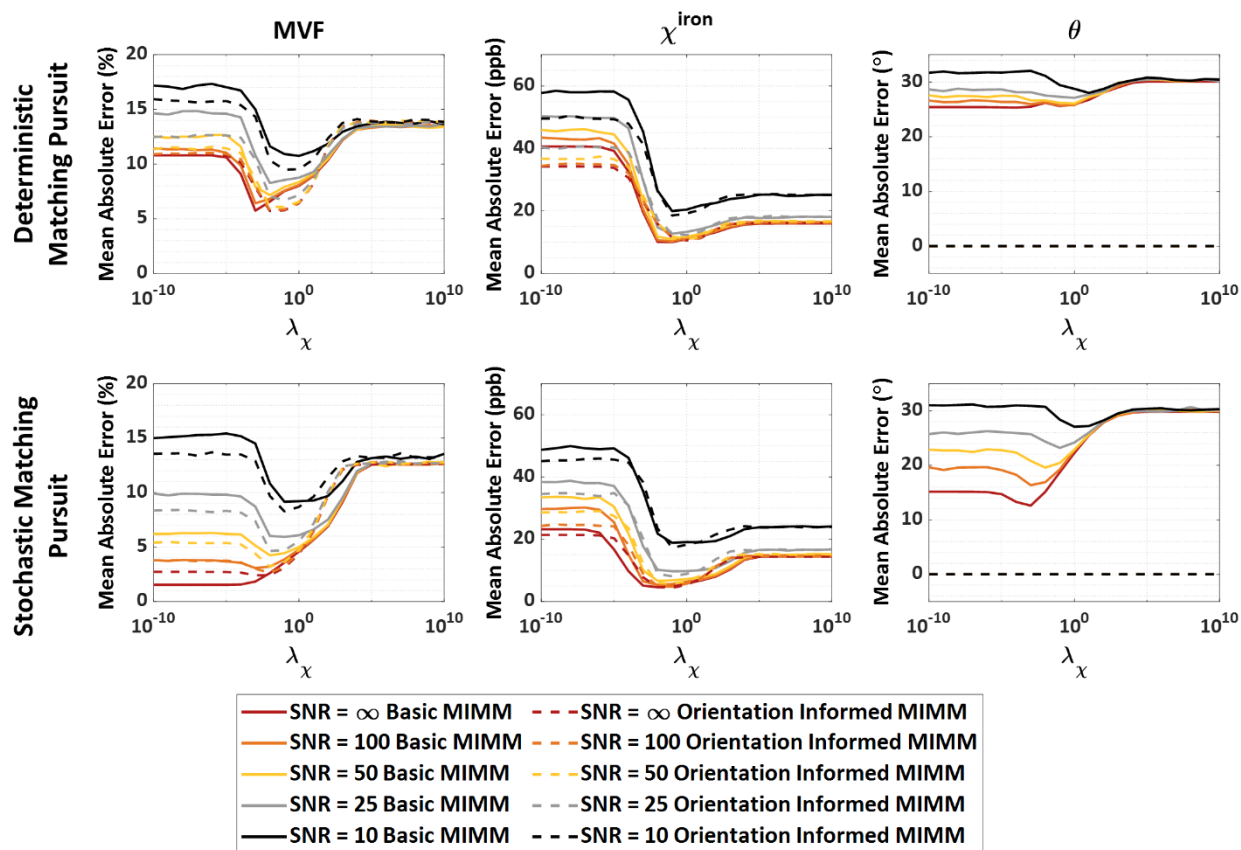

745  
 746 Figure S1. Monte Carlo simulation results using both the deterministic (top row) and  
 747 stochastic (bottom row) matching pursuit to demonstrate the SNR performance of the  
 748 algorithms with different  $\lambda_\chi$  values. Columns show the mean absolute errors for the 3  
 749 outputs of the matching pursuit process: MVF,  $\chi^{iron}$ , and  $\theta$ . Solid lines show the errors  
 750 for the basic matching pursuit whereas dashed lines show the errors for orientation  
 751 informed matching pursuit for 5 different SNR levels.

752



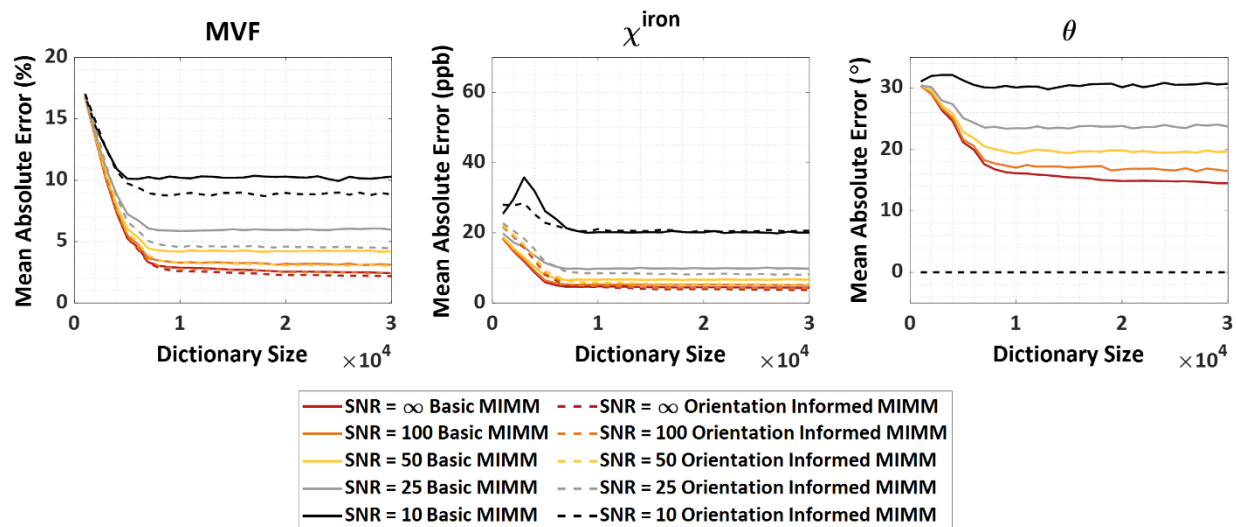

753

754 Figure S2. Monte Carlo simulation results to demonstrate the SNR performance of MIMM  
 755 with different dictionary sizes. Columns show the mean absolute errors for the 3 outputs  
 756 of the matching pursuit process: MVF,  $\chi^{iron}$ , and  $\theta$ . Solid lines show the errors for the  
 757 basic MIMM whereas dashed lines show the errors for orientation informed MIMM for 5  
 758 different SNR levels.

759

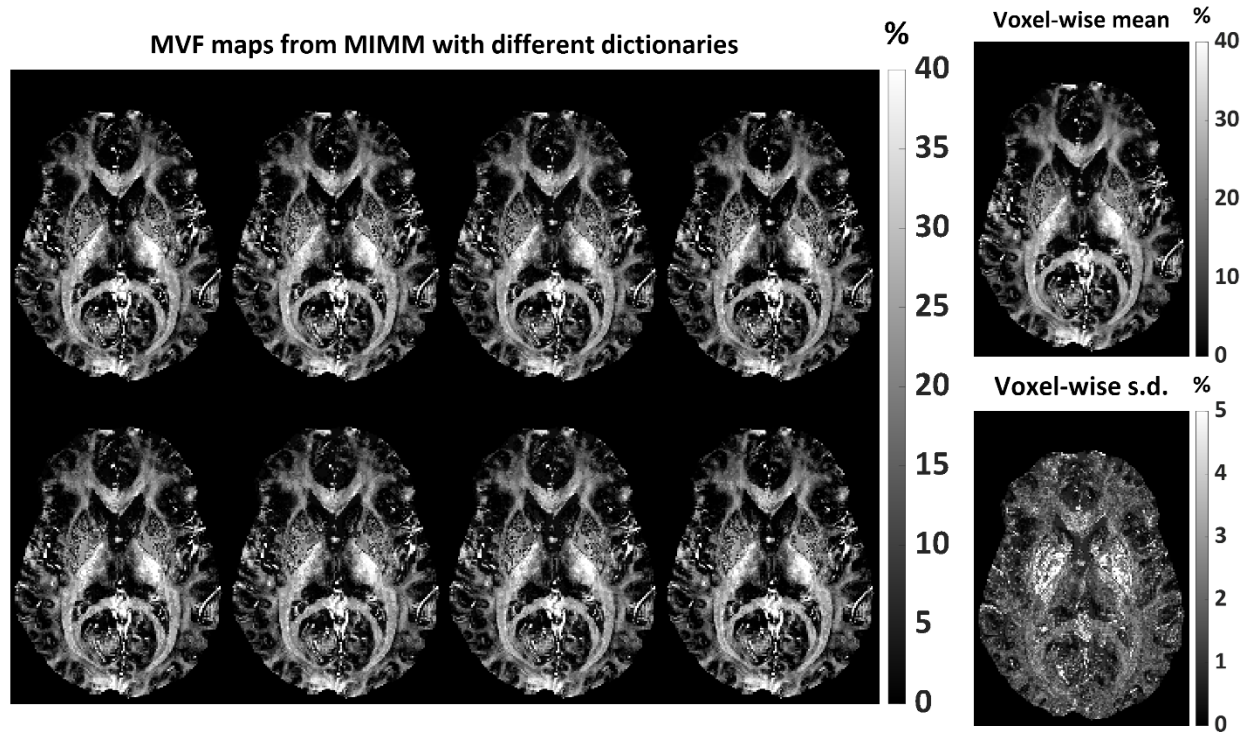

760

761 Figure S3. MVF maps obtained using orientation informed MIMM using DTI and 8  
762 different and independently created dictionaries of size 10000 (left).  $\lambda_\chi = 0.015$  is used.

763 The voxel-wise mean and standard deviation (S.D.) maps of the 8 MVF maps (right).

764

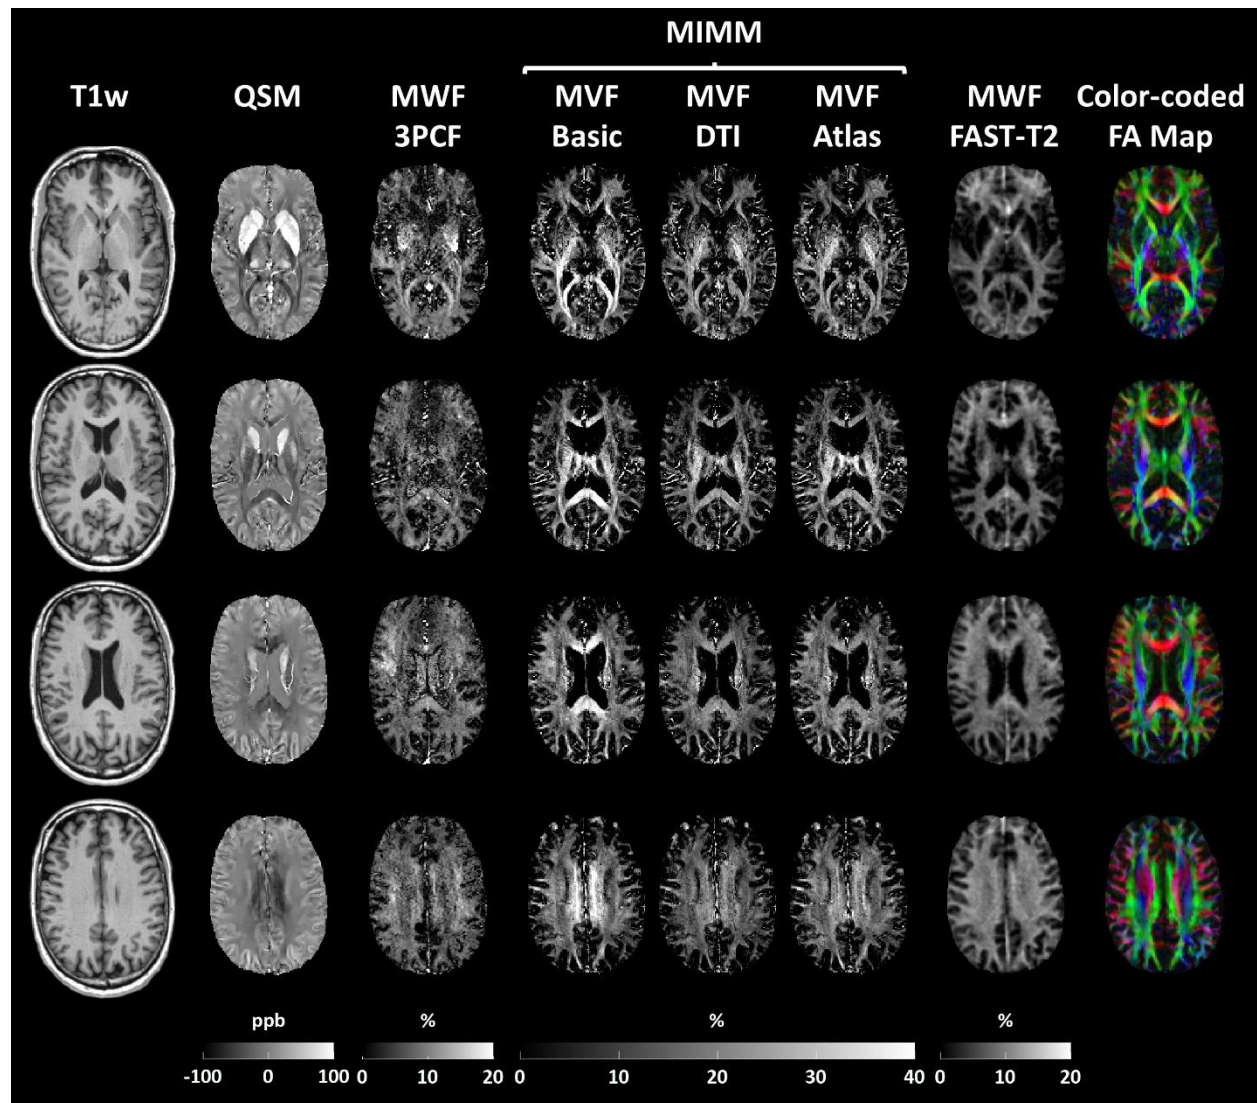

765

766 Figure S4. Example results from another subject. From left to right: T1-weighted images  
767 (T1w), QSM maps, MWF maps obtained with 3 pool complex fitting (3PCF), MWF maps  
768 obtained with basic MIMM, DTI orientation informed MIMM, and atlas orientation informed  
769 MIMM, MWF maps obtained using T2-relaxometry from the FAST-T2 data, and FA maps  
770 obtained from diffusion tensor images. All images are registered to the QSM space.

771

### Subject Specific Correlation Plots for 3 Pool Complex Fitting

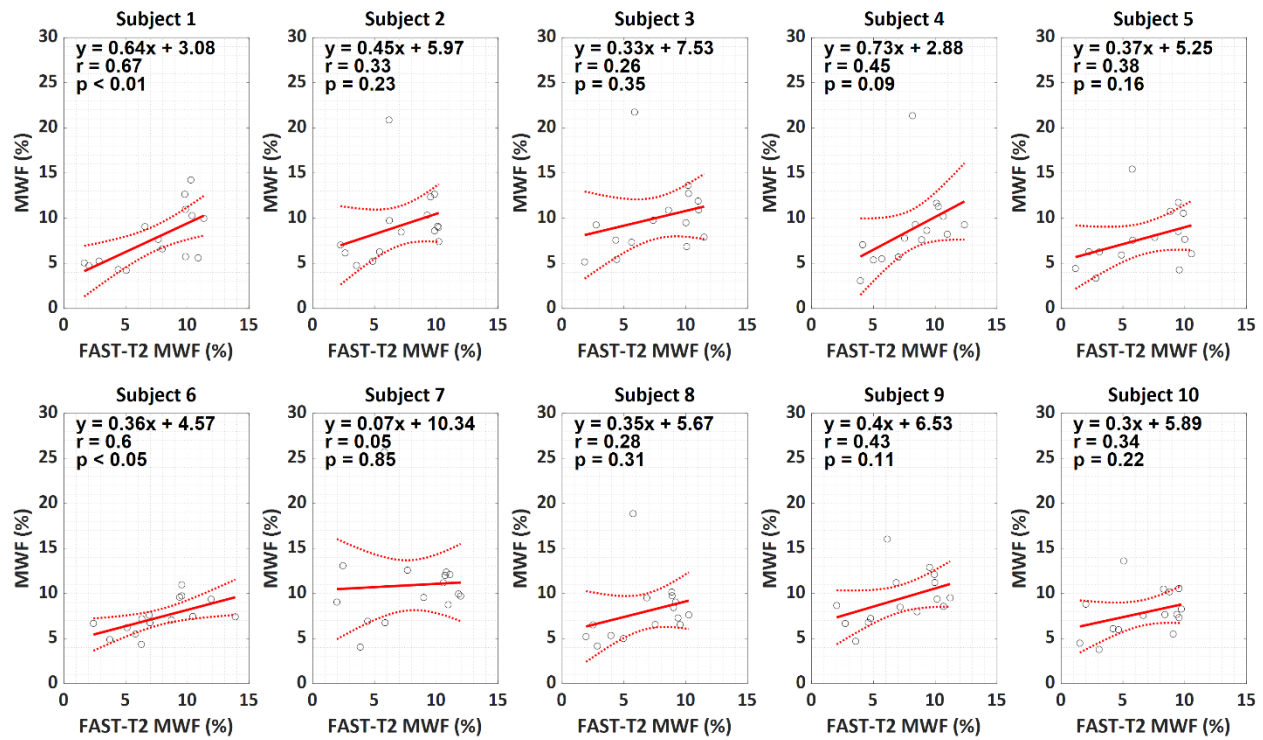

772

773 Figure S5. Subject-specific linear correlation analysis results between FAST-T2 based

774 MWF maps and MWF maps obtained with 3 pool complex fitting.

775

### Subject Specific Correlation Plots for Basic MIMM

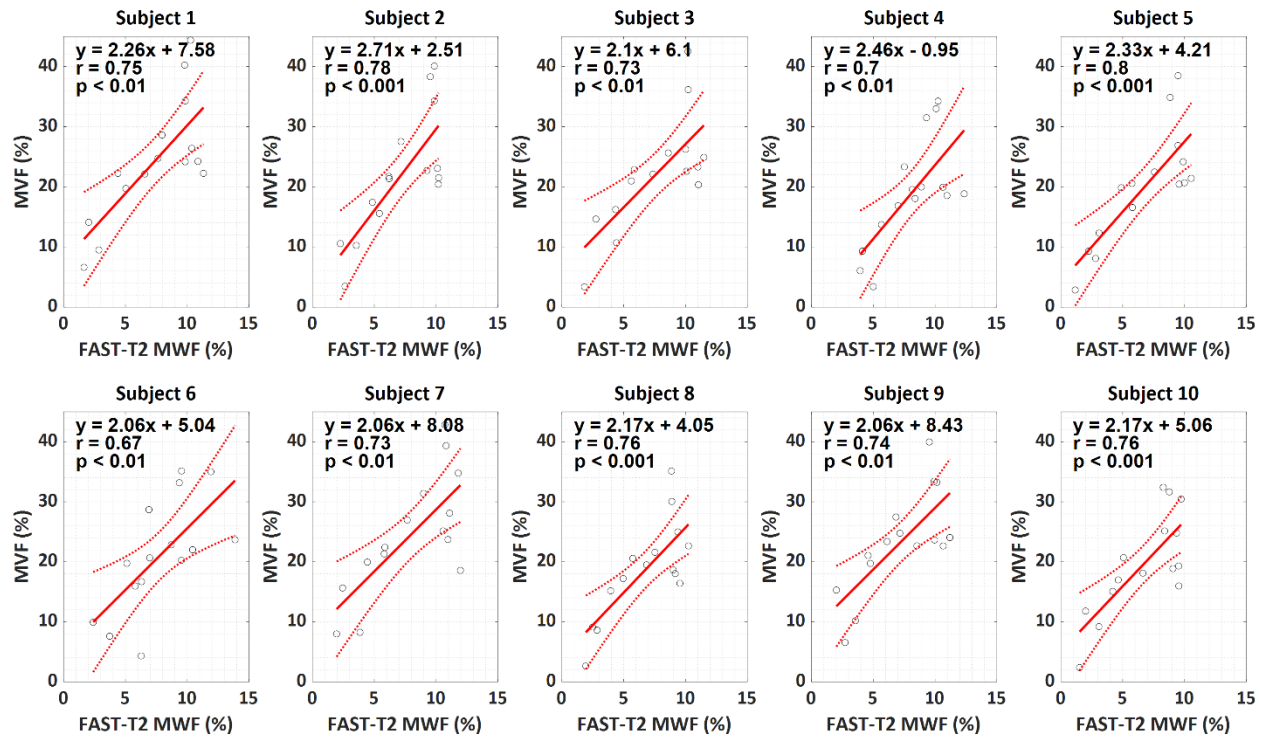

776

777 Figure S6. Subject-specific linear correlation analysis results between FAST-T2 based

778 MWF maps and MVF maps obtained with basic MIMM.

779

### Subject Specific Correlation Plots for DTI Orientation Informed MIMM

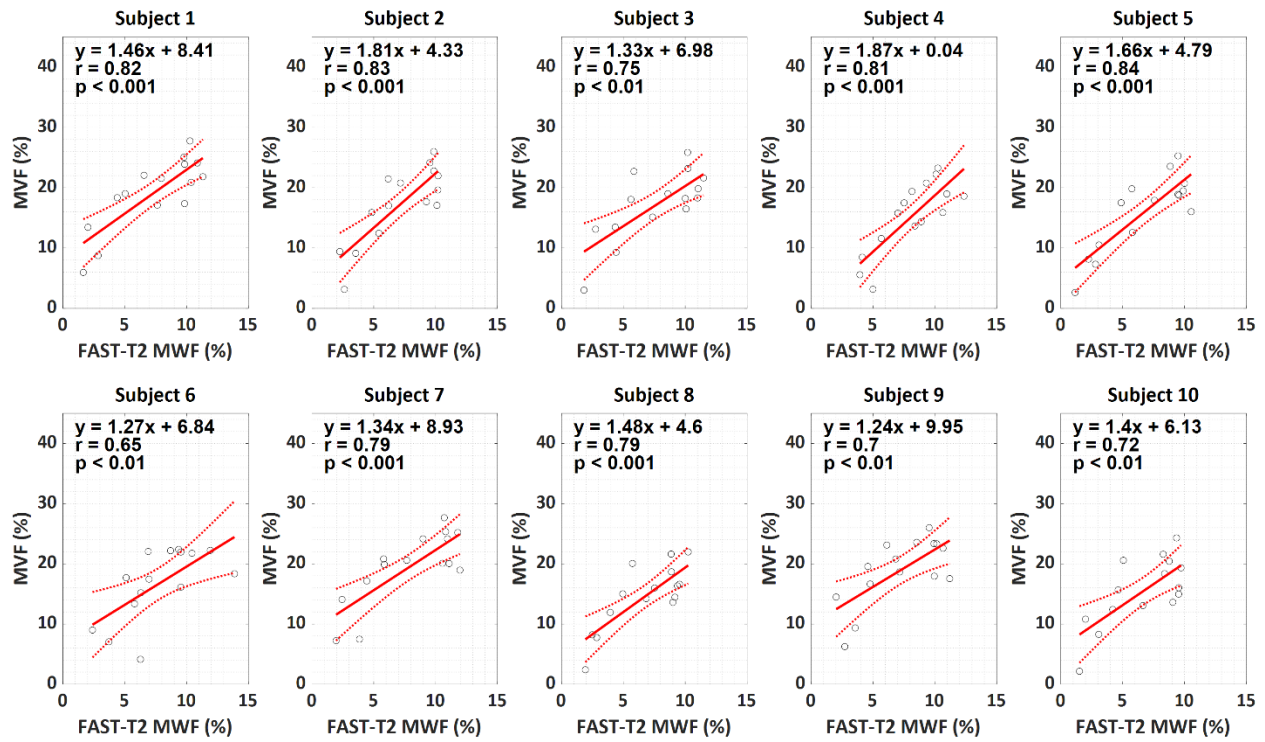

780

781 Figure S7. Subject-specific linear correlation analysis results between FAST-T2 based

782 MWF maps and MVF maps obtained with DTI orientation informed MIMM.

783

### Subject Specific Correlation Plots for Atlas Orientation Informed MIMM

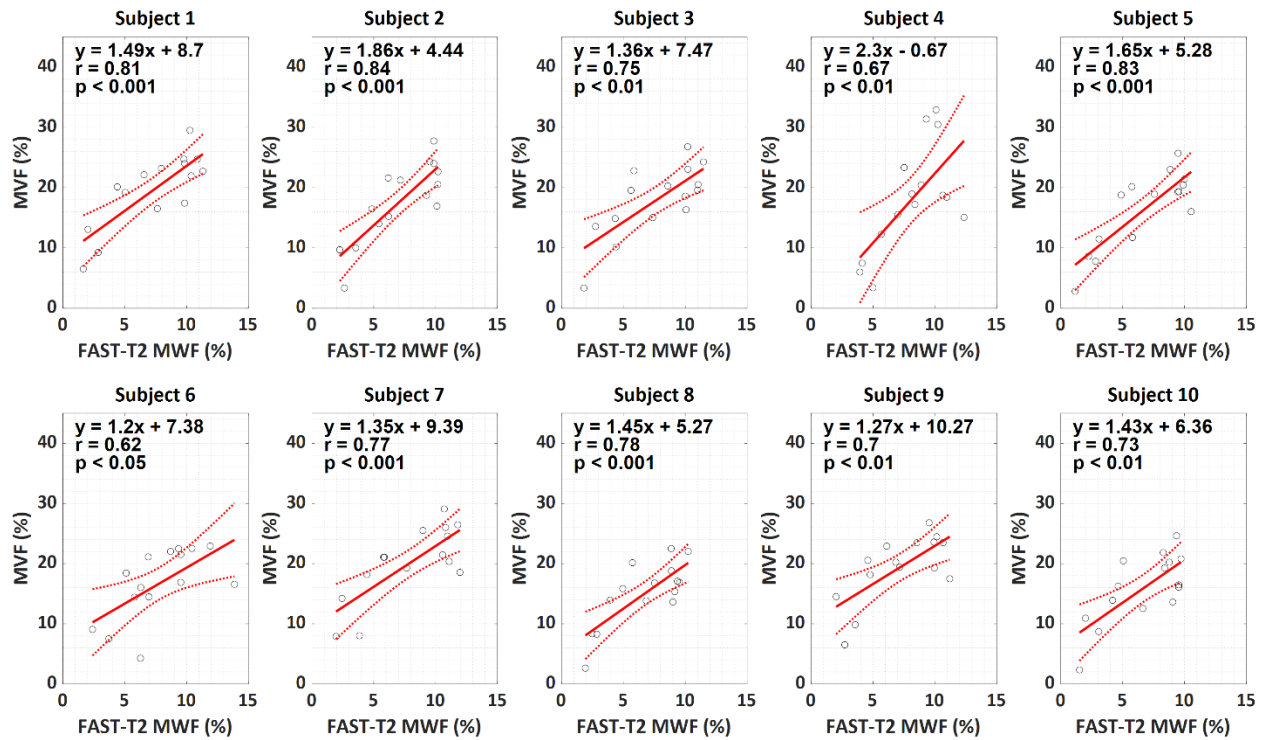

784

785 Figure S8. Subject-specific linear correlation analysis results between FAST-T2 based  
786 MWF maps and MVF maps obtained with atlas orientation informed MIMM.

787

788

789

790

791

792

793

794

## 795 REFERENCES

- 796 Adachi, Y., Sato, N., Saito, Y., Kimura, Y., Nakata, Y., Ito, K., . . . Ogawa, M. (2015).  
797 Usefulness of SWI for the detection of iron in the motor cortex in amyotrophic  
798 lateral sclerosis. *Journal of Neuroimaging*, 25(3), 443-451.
- 799 Avants, B. B., Tustison, N., & Song, G. (2009). Advanced normalization tools (ANTS).  
800 *Insight j*, 2(365), 1-35.
- 801 Azuma, M., Hirai, T., Yamada, K., Yamashita, S., Ando, Y., Tateishi, M., . . . Yamashita,  
802 Y. (2016). Lateral asymmetry and spatial difference of iron deposition in the  
803 substantia nigra of patients with Parkinson disease measured with quantitative  
804 susceptibility mapping. *American Journal of Neuroradiology*, 37(5), 782-788.
- 805 Bartels, L. M., Doucette, J., Birkl, C., Zhang, Y., Weber, A. M., & Rauscher, A. (2022).  
806 Orientation dependence of R2 relaxation in the newborn brain. *Neuroimage*, 264,  
807 119702.
- 808 Bean, B. P. (2007). The action potential in mammalian central neurons. *Nature Reviews*  
809 *Neuroscience*, 8(6), 451-465.
- 810 Behrens, T. E., Woolrich, M. W., Jenkinson, M., Johansen-Berg, H., Nunes, R. G., Clare,  
811 S., . . . Smith, S. M. (2003). Characterization and propagation of uncertainty in  
812 diffusion-weighted MR imaging. *Magnetic Resonance in Medicine: An Official*  
813 *Journal of the International Society for Magnetic Resonance in Medicine*, 50(5),  
814 1077-1088.
- 815 Bergeaud, F., & Mallat, S. (1995). *Matching pursuit of images*. Paper presented at the  
816 proceedings., International Conference on Image Processing.
- 817 Birkl, C., Birkl-Toeglhofer, A. M., Endmayr, V., Höftberger, R., Kasprian, G., Krebs, C., . .  
818 . Rauscher, A. (2019). The influence of brain iron on myelin water imaging.  
819 *Neuroimage*, 199, 545-552.
- 820 Birkl, C., Birkl-Toeglhofer, A. M., Kames, C., Goessler, W., Haybaeck, J., Fazekas, F., . .  
821 . Rauscher, A. (2020). The influence of iron oxidation state on quantitative MRI  
822 parameters in post mortem human brain. *Neuroimage*, 220, 117080.
- 823 Birkl, C., Doucette, J., Fan, M., Hernández-Torres, E., & Rauscher, A. (2021). Myelin  
824 water imaging depends on white matter fiber orientation in the human brain.  
825 *Magnetic resonance in medicine*, 85(4), 2221-2231.
- 826 Brady, S., Siegel, G., Albers, R.W., & Price, D. L. (2005). *Basic neurochemistry:*  
827 *molecular, cellular and medical aspects*: Elsevier.
- 828 Campbell, J. S., Leppert, I. R., Narayanan, S., Boudreau, M., Duval, T., Cohen-Adad, J.,  
829 . . . Stikov, N. (2018). Promise and pitfalls of g-ratio estimation with MRI.  
830 *Neuroimage*, 182, 80-96.
- 831 Chan, K. S., Chamberland, M., & Marques, J. P. (2023). On the performance of multi-  
832 compartment relaxometry for myelin water imaging (MCR-MWI)–test-retest  
833 repeatability and inter-protocol reproducibility. *Neuroimage*, 266, 119824.
- 834 Chan, K. S., & Marques, J. P. (2020). Multi-compartment relaxometry and diffusion  
835 informed myelin water imaging–promises and challenges of new gradient echo  
836 myelin water imaging methods. *Neuroimage*, 221, 117159.
- 837 Chen, R. B., Chu, C.H., Lai, T.Y. and Wu, Y.N. (2011). Stochastic matching pursuit for  
838 Bayesian variable selection. *Statistics and Computing*, 21, 247-259.



- 839 Cho, J., Spincemaille, P., Nguyen, T. D., Gupta, A., & Wang, Y. (2021). Temporal  
840 clustering, tissue composition, and total variation for mapping oxygen extraction  
841 fraction using QSM and quantitative BOLD. *Magnetic resonance in medicine*,  
842 86(5), 2635-2646.
- 843 Clemente-León, M., Coronado, E., Soriano-Portillo, A., Colacio, E., Domínguez-Vera, J.  
844 M., Gálvez, N., . . . Martín-Romero, M. T. (2006). Magnetic Langmuir– Blodgett  
845 Films of Ferritin with Different Iron Contents. *Langmuir*, 22(16), 6993-7000.
- 846 Cusack, R., & Papadakis, N. (2002). New robust 3-D phase unwrapping algorithms:  
847 application to magnetic field mapping and undistorting echoplanar images.  
848 *Neuroimage*, 16(3), 754-764.
- 849 Danz, A. (2020). Bubblebath.m. Retrieved from  
850 <https://www.mathworks.com/matlabcentral/fileexchange/70348>
- 851 Dimov, A. V., Liu, T., Spincemaille, P., Ecanow, J. S., Tan, H., Edelman, R. R., & Wang,  
852 Y. (2015). Joint estimation of chemical shift and quantitative susceptibility mapping  
853 (chemical QSM). *Magn Reson Med*, 73(6), 2100-2110. doi:10.1002/mrm.25328
- 854 Dimov, A. V., Liu, Z., Spincemaille, P., Prince, M. R., Du, J., & Wang, Y. (2018). Bone  
855 quantitative susceptibility mapping using a chemical species-specific R2\* signal  
856 model with ultrashort and conventional echo data. *Magn Reson Med*, 79(1), 121-  
857 128. doi:10.1002/mrm.26648
- 858 Dimov, A. V., Liu, Z., Spincemaille, P., Prince, M. R., Du, J., & Wang, Y. (2018). Bone  
859 quantitative susceptibility mapping using a chemical species-specific signal model  
860 with ultrashort and conventional echo data. *Magnetic resonance in medicine*,  
861 79(1), 121-128.
- 862 Dimov, A. V., Nguyen, T. D., Spincemaille, P., Sweeney, E. M., Zinger, N., Kovanlikaya,  
863 I., . . . Wang, Y. (2022). Global cerebrospinal fluid as a zero-reference  
864 regularization for brain quantitative susceptibility mapping. *Journal of*  
865 *Neuroimaging*, 32(1), 141-147.
- 866 Dobson, R., & Giovannoni, G. (2019). Multiple sclerosis—a review. *European journal of*  
867 *neurology*, 26(1), 27-40.
- 868 Dong, Z., Wang, F., Chan, K. S., Reese, T. G., Bilgic, B., Marques, J. P., & Setsompop,  
869 K. (2021). Variable flip angle echo planar time-resolved imaging (vFA-EPTI) for  
870 fast high-resolution gradient echo myelin water imaging. *Neuroimage*, 232,  
871 117897.
- 872 Du, Y. P., Chu, R., Hwang, D., Brown, M. S., Kleinschmidt-DeMasters, B. K., Singel, D.,  
873 & Simon, J. H. (2007). Fast multislice mapping of the myelin water fraction using  
874 multicompartment analysis of T decay at 3T: A preliminary postmortem study.  
875 *Magnetic Resonance in Medicine: An Official Journal of the International Society*  
876 *for Magnetic Resonance in Medicine*, 58(5), 865-870.
- 877 Eskreis-Winkler, S., Deh, K., Gupta, A., Liu, T., Wisnieff, C., Jin, M., . . . Spincemaille, P.  
878 (2015). Multiple sclerosis lesion geometry in quantitative susceptibility mapping  
879 (QSM) and phase imaging. *J Magn Reson Imaging*, 42(1), 224-229.  
880 doi:10.1002/jmri.24745
- 881 Fischl, B. (2012). FreeSurfer. *Neuroimage*, 62(2), 774-781.
- 882 Graf von Keyserlingk, D., & Schramm, U. (1984). Diameter of axons and thickness of  
883 myelin sheaths of the pyramidal tract fibres in the adult human medullary pyramid.  
884 *Anatomischer Anzeiger*, 157(2), 97-111.

- 885 Haacke, E. M., Xu, Y., Cheng, Y. C. N., & Reichenbach, J. R. (2004). Susceptibility  
886 weighted imaging (SWI). *Magnetic Resonance in Medicine: An Official Journal of*  
887 *the International Society for Magnetic Resonance in Medicine*, 52(3), 612-618.
- 888 Hansen, P. C. (1992). Analysis of discrete ill-posed problems by means of the L-curve.  
889 *SIAM review*, 34(4), 561-580.
- 890 Hwang, D., Kim, D. H., & Du, Y. P. (2010). In vivo multi-slice mapping of myelin water  
891 content using T2\* decay. *Neuroimage*, 52(1), 198-204.
- 892 Hédouin, R., Metere, R., Chan, K. S., Licht, C., Mollink, J., Van Walsum, A. M. C., &  
893 Marques, J. P. (2021). Decoding the microstructural properties of white matter  
894 using realistic models. *Neuroimage*, 237, 118138.
- 895 Jenkinson, M., Bannister, P., Brady, M., & Smith, S. (2002). Improved optimization for the  
896 robust and accurate linear registration and motion correction of brain images.  
897 *Neuroimage*, 17(2), 825-841.
- 898 Jenkinson, M., Beckmann, C. F., Behrens, T. E., Woolrich, M. W., & Smith, S. M. (2012).  
899 FSL. *Neuroimage*, 62(2), 782-790.
- 900 Jung, S., Yun, J., Kim, D. Y., & Kim, D. H. (2022). Improved multi-echo gradient echo  
901 myelin water fraction mapping using complex-valued neural network analysis.  
902 *Magnetic resonance in medicine*, 88(1), 492-500.
- 903 Kee, Y., Liu, Z., Zhou, L., Dimov, A., Cho, J., de Rochefort, L., . . . Wang, Y. (2017).  
904 Quantitative Susceptibility Mapping (QSM) Algorithms: Mathematical Rationale  
905 and Computational Implementations. *IEEE Trans Biomed Eng*, 64(11), 2531-2545.  
906 doi:10.1109/TBME.2017.2749298
- 907 Kolind, S., Sharma, R., Knight, S., Johansen-Berg, H., Talbot, K., & Turner, M. R. (2013).  
908 Myelin imaging in amyotrophic and primary lateral sclerosis. *Amyotroph Lateral*  
909 *Scler Frontotemporal Degener*, 14(7-8), 562-573.  
910 doi:10.3109/21678421.2013.794843
- 911 Kolind, S. H., Mädler, B., Fischer, S., Li, D. K., & MacKay, A. L. (2009). Myelin water  
912 imaging: implementation and development at 3.0 T and comparison to 1.5 T  
913 measurements. *Magnetic Resonance in Medicine: An Official Journal of the*  
914 *International Society for Magnetic Resonance in Medicine*, 62(1), 106-115.
- 915 Kwan, J. Y., Jeong, S. Y., Van Gelderen, P., Deng, H. X., Quezado, M. M., Danielian, L.  
916 E., . . . Siddique, T. (2012). Iron accumulation in deep cortical layers accounts for  
917 MRI signal abnormalities in ALS: correlating 7 tesla MRI and pathology. *PloS one*,  
918 7(4), e35241.
- 919 Lazari, A., & Lipp, I. (2021). Can MRI measure myelin? Systematic review, qualitative  
920 assessment, and meta-analysis of studies validating microstructural imaging with  
921 myelin histology. *Neuroimage*, 230, 117744.
- 922 Lee, H., Nam, Y., Lee, H. J., Hsu, J. J., Henry, R. G., & Kim, D. H. (2018). Improved three-  
923 dimensional multi-echo gradient echo based myelin water fraction mapping with  
924 phase related artifact correction. *Neuroimage*, 169, 1-10.
- 925 Lee, J., Hyun, J. W., Lee, J., Choi, E. J., Shin, H. G., Min, K., . . . Oh, S. H. (2021). So  
926 you want to image myelin using MRI: an overview and practical guide for myelin  
927 water imaging. *Journal of Magnetic Resonance Imaging*, 53(2), 360-373.
- 928 Lee, S., Shin, H. G., Kim, M., & Lee, J. (2023). Depth-wise profiles of iron and myelin in  
929 the cortex and white matter using  $\chi$ -separation: A preliminary study. *Neuroimage*,  
930 273, 120058.

- 931 Liu, J., Liu, T., de Rochefort, L., Ledoux, J., Khalidov, I., Chen, W., . . . Wang, Y. (2012).  
932 Morphology enabled dipole inversion for quantitative susceptibility mapping using  
933 structural consistency between the magnitude image and the susceptibility map.  
934 *Neuroimage*, 59(3), 2560-2568.
- 935 Liu, T., Khalidov, I., de Rochefort, L., Spincemaille, P., Liu, J., Tsiouris, A. J., & Wang, Y.  
936 (2011). A novel background field removal method for MRI using projection onto  
937 dipole fields. *NMR in Biomedicine*, 24(9), 1129-1136.
- 938 Liu, T., Spincemaille, P., de Rochefort, L., Wong, R., Prince, M., & Wang, Y. (2010).  
939 Unambiguous identification of superparamagnetic iron oxide particles through  
940 quantitative susceptibility mapping of the nonlinear response to magnetic fields.  
941 *Magnetic resonance imaging*, 28(9), 1383-1389.
- 942 Liu, T., Wisnieff, C., Lou, M., Chen, W., Spincemaille, P., & Wang, Y. (2013). Nonlinear  
943 formulation of the magnetic field to source relationship for robust quantitative  
944 susceptibility mapping. *Magnetic resonance in medicine*, 69(2), 467-476.
- 945 Liu, Y., Ye, Q., Zeng, F., Jiang, X., Cai, B., Lv, W., & Wen, J. (2021). Library-driven  
946 approach for fast implementation of the voxel spread function to correct magnetic  
947 field inhomogeneity artifacts for gradient-echo sequences. *Medical physics*, 48(7),  
948 3714-3720.
- 949 Liu, Z., Spincemaille, P., Yao, Y., Zhang, Y., & Wang, Y. (2018). MEDI+0: Morphology  
950 enabled dipole inversion with automatic uniform cerebrospinal fluid zero reference  
951 for quantitative susceptibility mapping. *Magn Reson Med*, 79(5), 2795-2803.  
952 doi:10.1002/mrm.26946
- 953 Ma, D., Gulani, V., Seiberlich, N., Liu, K., , S., J.L., Duerk, J. L., & Griswold, M. A. (2013).  
954 Magnetic resonance fingerprinting. *Nature*, 495(7440), 187-192.
- 955 MacKay, A., Laule, C., Vavasour, I., Bjarnason, T., Kolind, S., & Mädler, B. (2006).  
956 Insights into brain microstructure from the T2 distribution. *Magnetic resonance*  
957 *imaging*, 24(4), 515-525.
- 958 Mackay, A., Whittall, K., Adler, J., Li, D., Paty, D., & Graeb, D. (1994). In vivo visualization  
959 of myelin water in brain by magnetic resonance. *Magnetic resonance in medicine*,  
960 31(6), 673-677.
- 961 MacKay, A. L., & Laule, C. (2016). Magnetic resonance of myelin water: an in vivo marker  
962 for myelin. *Brain plasticity* 2, 2(1), 71-91.
- 963 Mallat, S., & Zhang, Z. (1992). *Adaptive time-frequency decomposition with matching*  
964 *pursuits*. Paper presented at the Proceedings of the IEEE-SP International  
965 Symposium on Time-Frequency and Time-Scale Analysis.
- 966 Mancini, M., Karakuzu, A., Cohen-Adad, J., Cercignani, M., Nichols, T. E., & Stikov, N.  
967 (2020). An interactive meta-analysis of MRI biomarkers of myelin. *Elife*, 9, e61523.
- 968 Marcille, M., Hurtado Rúa, S., Tyshkov, C., Jaywant, A., Comunale, J., Kaunzner, U. W.,  
969 . . . Bruvik, O. (2022). Disease correlates of rim lesions on quantitative  
970 susceptibility mapping in multiple sclerosis. *Scientific Reports*, 12(1), 4411.
- 971 Markl, M., & Leupold, J. (2012). Gradient echo imaging. *Journal of Magnetic Resonance*  
972 *Imaging*, 35(6), 1274-1289.
- 973 Mazziotta, J. C., Toga, A. W., Evans, A., Fox, P., & Lancaster, J. (1995). A probabilistic  
974 atlas of the human brain: theory and rationale for its development. . *Neuroimage*,  
975 2(2), 89-101.

- 976 Meyers, S. M., Kolind, S. H., & MacKay, A. L. (2017). Simultaneous measurement of total  
977 water content and myelin water fraction in brain at 3T using a T. *Magn Reson*  
978 *Imaging*, 37, 187-194. doi:10.1016/j.mri.2016.12.001
- 979 Mori, S., Oishi, K., Jiang, H., Jiang, L., Li, X., Akhter, K., . . . Toga, A. W. (2008).  
980 Stereotaxic white matter atlas based on diffusion tensor imaging in an ICBM  
981 template. *Neuroimage*, 40(2), 570-582.
- 982 Nam, Y., Lee, J., Hwang, D., & Kim, D. H. (2015). Improved estimation of myelin water  
983 fraction using complex model fitting. *Neuroimage*, 116, 214-221.
- 984 Nguyen, T. D., Deh, K., Monohan, E., Pandya, S., Spincemaille, P., Raj, A., . . . Gauthier,  
985 S. A. (2016). Feasibility and reproducibility of whole brain myelin water mapping in  
986 4 minutes using fast acquisition with spiral trajectory and adiabatic T2prep (FAST-  
987 T2) at 3T. *Magnetic resonance in medicine*, 76(2), 456-465.
- 988 Nguyen, T. D., Spincemaille, P., Gauthier, S. A., & Wang, Y. (2017). Rapid whole brain  
989 myelin water content mapping without an external water standard at 1.5 T.  
990 *Magnetic resonance imaging*, 39, 82-88.
- 991 Nguyen, T. D., Wisnieff, C., Cooper, M. A., Kumar, D., Raj, A., Spincemaille, P., . . .  
992 Gauthier, S. A. (2012). T2prep three-dimensional spiral imaging with efficient  
993 whole brain coverage for myelin water quantification at 1.5 tesla. *Magnetic*  
994 *resonance in medicine*, 67(3), 614-621.
- 995 Pal, N. R., & Pal, S. K. (1991). Entropy: A new definition and its applications. *IEEE*  
996 *transactions on systems, man, and cybernetics*, 21(5), 1260-1270.
- 997 Prasloski, T., Rauscher, A., MacKay, A. L., Hodgson, M., Vavasour, I. M., Laule, C., &  
998 Madler, B. (2012). Rapid whole cerebrum myelin water imaging using a 3D GRASE  
999 sequence. *Neuroimage*, 63(1), 533-539.
- 1000 Schweitzer, A. D., Liu, T., Gupta, A., Zheng, K., Seodial, S., Shtilbans, A., . . . Tsiouris,  
1001 A. J. (2015). Quantitative susceptibility mapping of the motor cortex in amyotrophic  
1002 lateral sclerosis and primary lateral sclerosis. *AJR Am JRoentgenol*, 204(5), 1086-  
1003 1092. doi:10.2214/AJR.14.13459
- 1004 Sisman, M., Nguyen, T. D., Dimov, A. V., Marcille, M., Spincemaille, P., Gauthier, S. A.,  
1005 & Wang, Y. (2023). *Myelin Volume Fraction Estimation in Multiple Sclerosis*  
1006 *Lesions*. Paper presented at the ISMRM & SMRT Annual Meeting & Exhibition.,  
1007 Toronto, ON, CANADA.
- 1008 Sisman, M., Romano, J. R., Dimov, A. V., Kovanlikaya, I., Spincemaille, P., Nguyen, T.  
1009 D., & Wang, Y. (2023). *Mapping Myelin Volume Fraction using Multiple Echo*  
1010 *Gradient Echo and Dictionary Matching*. Paper presented at the ISMRM & SMRT  
1011 Annual Meeting & Exhibition, Toronto, ON, CANADA.
- 1012 Sukstanskii, A. L., & Yablonskiy, D. A. (2014). On the role of neuronal magnetic  
1013 susceptibility and structure symmetry on gradient echo MR signal formation.  
1014 *Magnetic resonance in medicine*, 71(1), 345-353.
- 1015 Tropp, J., & Gilbert, A. C. (2007). Signal recovery from partial information via orthogonal  
1016 matching pursuit. *IEEE Trans. Inform. Theory*, 53(12), 4655-4666.
- 1017 van der Weijden, C. W., Garca, D. V., Borra, R. J., Thurner, P., Meilof, J. F., van Laar,  
1018 P. J., . . . de Vries, E. F. (2021). Myelin quantification with MRI: A systematic review  
1019 of accuracy and reproducibility. *Neuroimage*, 226, 117561.
- 1020 Wang, Y., & Liu, T. (2015). Quantitative susceptibility mapping (QSM): decoding MRI data  
1021 for a tissue magnetic biomarker. *Magnetic resonance in medicine*, 73(1), 82-101.

- 1022 Wen, Y., Spincemaille, P., Nguyen, T., Cho, J., Kovanlikaya, I., Anderson, J., . . . Wang,  
1023 Y. (2021). Multiecho complex total field inversion method (mcTFI) for improved  
1024 signal modeling in quantitative susceptibility mapping. *Magn Reson Med*, *86*(4),  
1025 2165-2178. doi:10.1002/mrm.28814
- 1026 Wharton, S., & Bowtell, R. (2012). Fiber orientation-dependent white matter contrast in  
1027 gradient echo MRI. *Proceedings of the National Academy of Sciences*, *109*(45),  
1028 18559-18564.
- 1029 Wharton, S., & Bowtell, R. (2013). Gradient echo based fiber orientation mapping using  
1030  $R2^*$  and frequency difference measurements. *Neuroimage*, *83*, 1011-1023.
- 1031 Wisnieff, C., Liu, T., Spincemaille, P., Wang, S., Zhou, D., & Wang, Y. (2013). Magnetic  
1032 susceptibility anisotropy: cylindrical symmetry from macroscopically ordered  
1033 anisotropic molecules and accuracy of MRI measurements using few orientations.  
1034 *Neuroimage*, *70*, 363-376.
- 1035 Wisnieff, C., Ramanan, S., Olesik, J., Gauthier, S., Wang, Y., & Pitt, D. (2015).  
1036 Quantitative susceptibility mapping (QSM) of white matter multiple sclerosis  
1037 lesions: interpreting positive susceptibility and the presence of iron. *Magnetic  
1038 Resonance in Medicine*, *74*(2), 564-570.
- 1039 Woolrich, M. W., Ripley, B. D., Brady, M., & Smith, S. M. (2001). Temporal autocorrelation  
1040 in univariate linear modeling of fMRI data. *Neuroimage*, *14*(6), 1370-1386.
- 1041 Xu, T., Foxley, S., Kleinnijenhuis, M., Chen, W. C., & Miller, K. L. (2018). The effect of  
1042 realistic geometries on the susceptibility-weighted MR signal in white matter.  
1043 *Magnetic resonance in medicine*, *79*(1), 489-500.
- 1044 Yablonskiy, D. A., Sukstanskii, A. L., Luo, J., & Wang, X. (2013). Voxel spread function  
1045 method for correction of magnetic field inhomogeneity effects in quantitative  
1046 gradient-echo-based MRI. *Magnetic resonance in medicine*, *70*(5), 1283-1292.
- 1047 Zheng, W., Nichol, H., Liu, S., Cheng, Y. C. N., & Haacke, E. M. (2013). Measuring iron  
1048 in the brain using quantitative susceptibility mapping and X-ray fluorescence  
1049 imaging. *Neuroimage*, *78*, 68-74.
- 1050
